# Supplementary material for: Anti-electrostatic cation⋯π-hole and cation⋯lp-hole interactions are stabilized via collective interactions
Source: Royal Society of Chemistry journal article supplement (doi:10.1039/d3cc05451a), 2023-12-05
Supplement: d3cc05451a1.pdf [file d3cc05451a1.pdf]

## Electronic Supplementary Information

# Anti-electrostatic Cation $\cdots\pi$ -Hole and Cation $\cdots$ lp-Hole Interactions Are Stabilized via Collective Interactions

Ricardo Pino-Rios<sup>1,2\*</sup>, Rodrigo Báez-Grez<sup>3</sup>, Cina Foroutan-Nejad<sup>4\*</sup>

1. *Química y Farmacia, Facultad de Ciencias de la Salud, Universidad Arturo Prat. Casilla 121, Iquique 1100000, Chile. [rpinoorios@unap.cl](mailto:rpinoorios@unap.cl).*

2. *Instituto de Estudios de la Salud, Universidad Arturo Prat. Iquique, 1100000. Chile.*

3. *Departamento de Química, Facultad de Ciencias Exactas, Universidad Andres Bello, Av. República 275, Santiago, Chile, 8370146*

4. *Institute of Organic Chemistry, Polish Academy of Sciences, Kasprzaka 44/52, 01-224, Warsaw, Poland*

Corresponding authors' e-mails:

RPR: [rpinoorios@unap.cl](mailto:rpinoorios@unap.cl)

CFN: [cina.foroutan-nejad@icho.edu.pl](mailto:cina.foroutan-nejad@icho.edu.pl)

## Computational Methods

All structures were optimized at the closed-shell and broken symmetry M06-2X<sup>1</sup>/def2TZVPP<sup>2</sup> computational levels. Single-point calculations were carried out at the same DFT level to obtain electrostatic potential maps using the Gaussian 16 software package.<sup>3</sup> The electrostatic potential cubes were produced using the Gaussian cubegen utility. The electron density cube files with the same grid were produced using the MultiWFN program.<sup>4</sup> The electrostatic potential values were plotted at different electron density isosurfaces for a qualitative study of the collective bonds. The reason for plotting ESPs at different isodensity values and color codes is that our molecules have diverse molecular charges from  $-1$  to  $+1$ . It is needless to say that one cannot use the same isodensity values and color codes for cations and anions. Nevertheless, we found the M and A atoms in MAX<sub>3</sub> species are always the most positive parts of the molecules but the negative potential was found to be rather dispersed. The nature of bonding in the target systems was further analyzed within the context of the independent gradient model (IGM)<sup>5,6</sup> via MultiWFN. IGM has an interpretation analogous to the well-known non-covalent interaction index (NCI)<sup>7</sup> but with the advantage that the surfaces are smoother than NCI and allow separation into fragments.<sup>8,9</sup> In this case, the fragments for the MAX<sub>3</sub> systems were M and AX<sub>3</sub> since the intention is to evaluate the existence of collective bonds. The isodensity, minimum, and maximum values for IGM plots are listed in Table S8. In a complementary way, quantification was carried out using the recently proposed intrinsic bond strength index (IBSI)<sup>10</sup>, which through a scale allows to evaluate the interaction between two atoms within a molecule. The figures were obtained using the Chemcraft program.<sup>11</sup>

## References

- 1 Y. Zhao and D. G. Truhlar, *Theor. Chem. Acc.*, 2008, **120**, 215–241.
- 2 F. Weigend and R. Ahlrichs, *Phys. Chem. Chem. Phys.*, 2005, **7**, 3297–3305.
- 3 T. H. Dunning, *J. Chem. Phys.*, 1989, **90**, 1007–1023.
- 4 T. Lu and F. Chen, *J. Comput. Chem.*, 2012, **33**, 580–592.
- 5 C. Lefebvre, G. Rubez, H. Khartabil, J.-C. Boisson, J. Contreras-García and E. Hénon, *Phys. Chem. Chem. Phys.*, 2017, **19**, 17928–17936.
- 6 C. Lefebvre, H. Khartabil, J.-C. Boisson, J. Contreras-García, J.-P. Piquemal and E. Hénon, *ChemPhysChem*, 2018, **19**, 724–735.
- 7 E. R. Johnson, S. Keinan, P. Mori-Sánchez, J. Contreras-García, A. J. Cohen and W. Yang, *J. Am. Chem. Soc.*, 2010, **132**, 6498–6506.
- 8 R. Báez-Grez and R. Pino-Rios, *ACS Omega*, 2023, **8**, 23168–23173.
- 9 M. Ponce-Vargas, C. Lefebvre, J.-C. Boisson and E. Hénon, *J. Chem. Inf. Model.*, 2020, **60**, 268–278.
- 10 J. Klein, H. Khartabil, J.-C. Boisson, J. Contreras-García, J.-P. Piquemal and E. Hénon, *J. Phys. Chem. A*, 2020, **124**, 1850–1860.
- 11 G. A. Andrienko, Chemcraft - graphical software for visualization of quantum chemistry computations. Version 1.8, build 654. <https://www.chemcraftprog.com> (version 1.8)

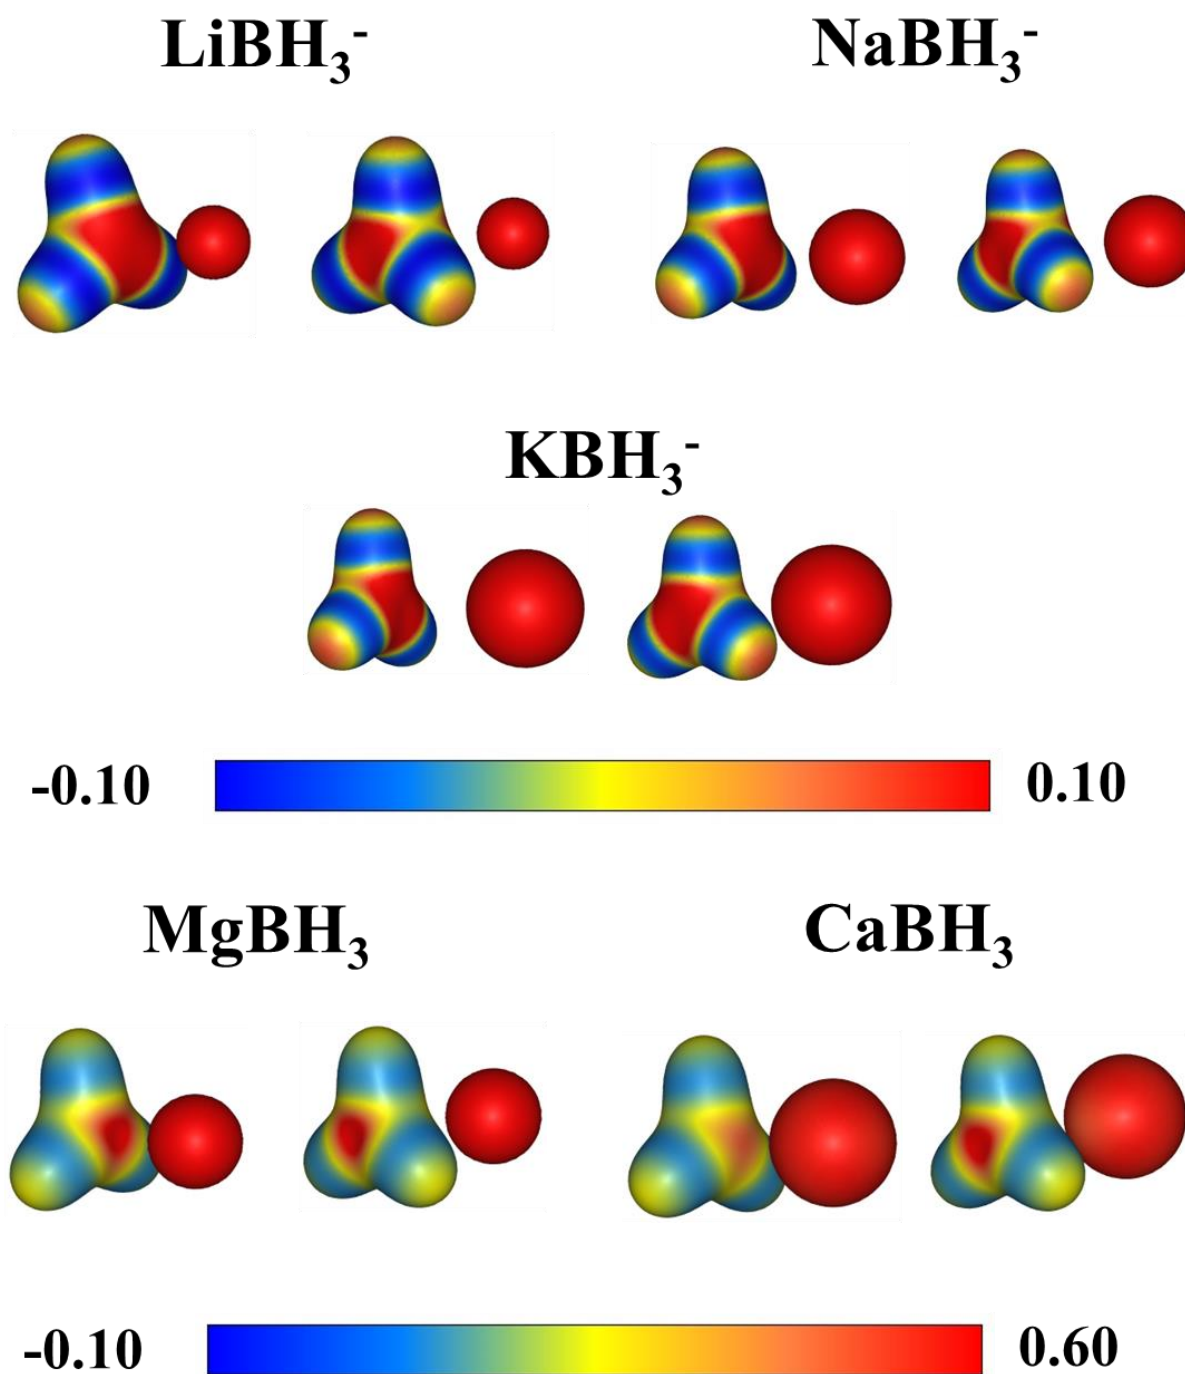

**Figure S1.** The electrostatic potential maps (in a.u) of  $(M^{n+}BH_3)^{n-2}$  ( $M = Li, Na, K, Mg$  and  $Ca$ ).

Density isovalue: 0.05 a.u.

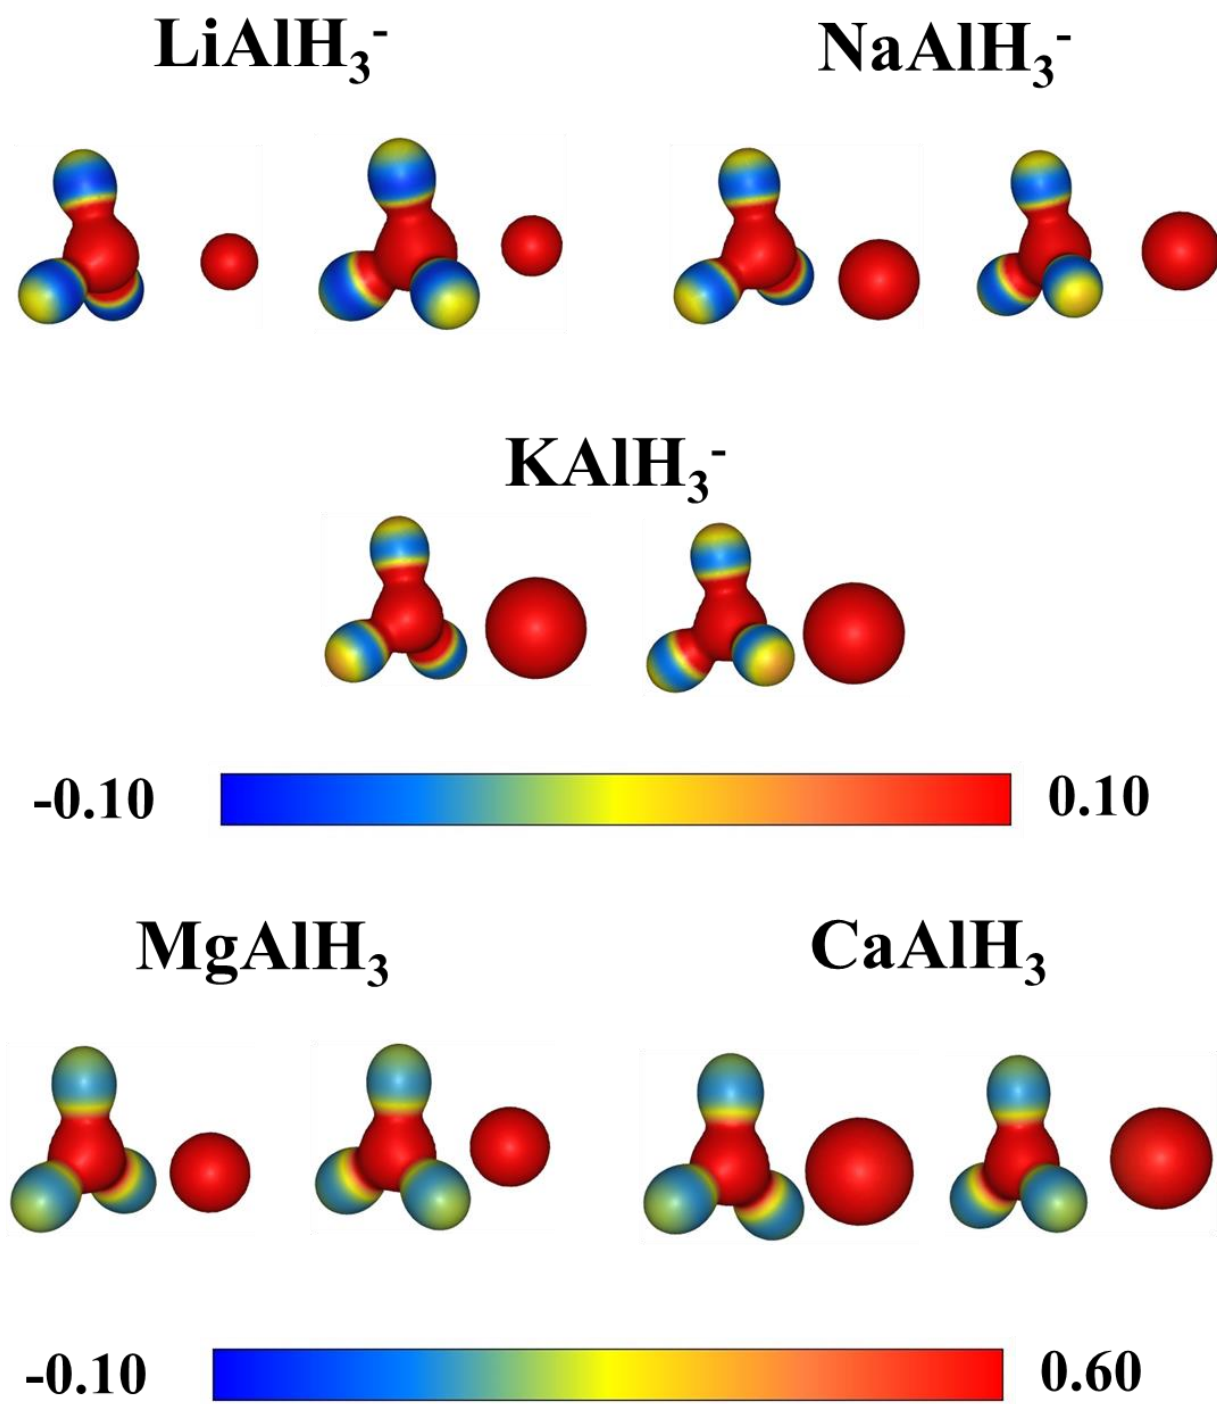

**Figure S2.** Electrostatic potential maps (in a.u) of  $(M^{n+}AlH_3)^{n-2}$  ( $M = Li, Na, K, Mg$  and  $Ca$ ).

Density isovalue: 0.05 a.u.

**Pyramidal**

**Inverted**

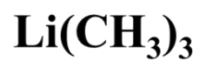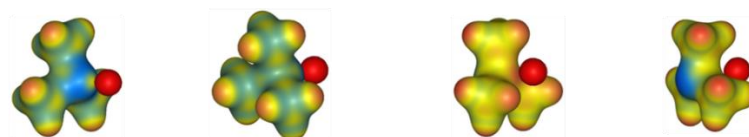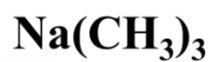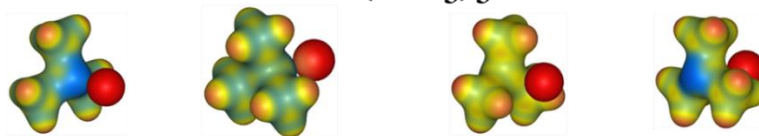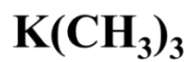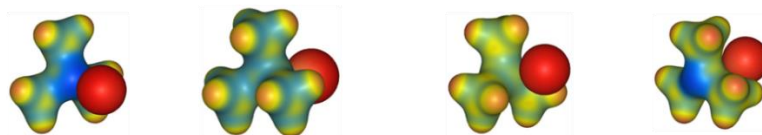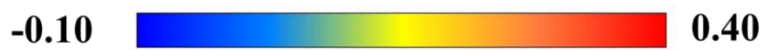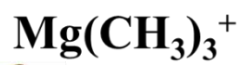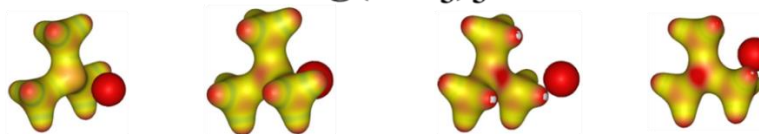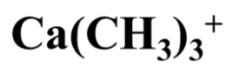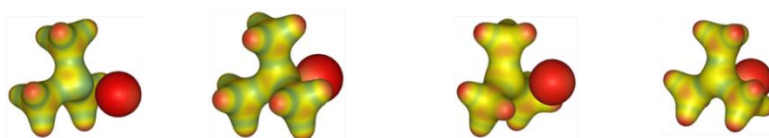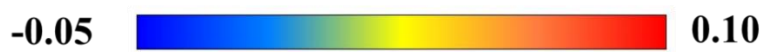

**Figure S3.** Electrostatic potential maps (in a.u) of pyramidal and inverted  $(M^{n+}C(CH_3)_3)^{n-1}$  structures (M = Li, Na, K, Mg and Ca). Density isovalues: 0.05 a.u. (for M = Li, Na, K) and 0.10 (For M = Mg, Ca)

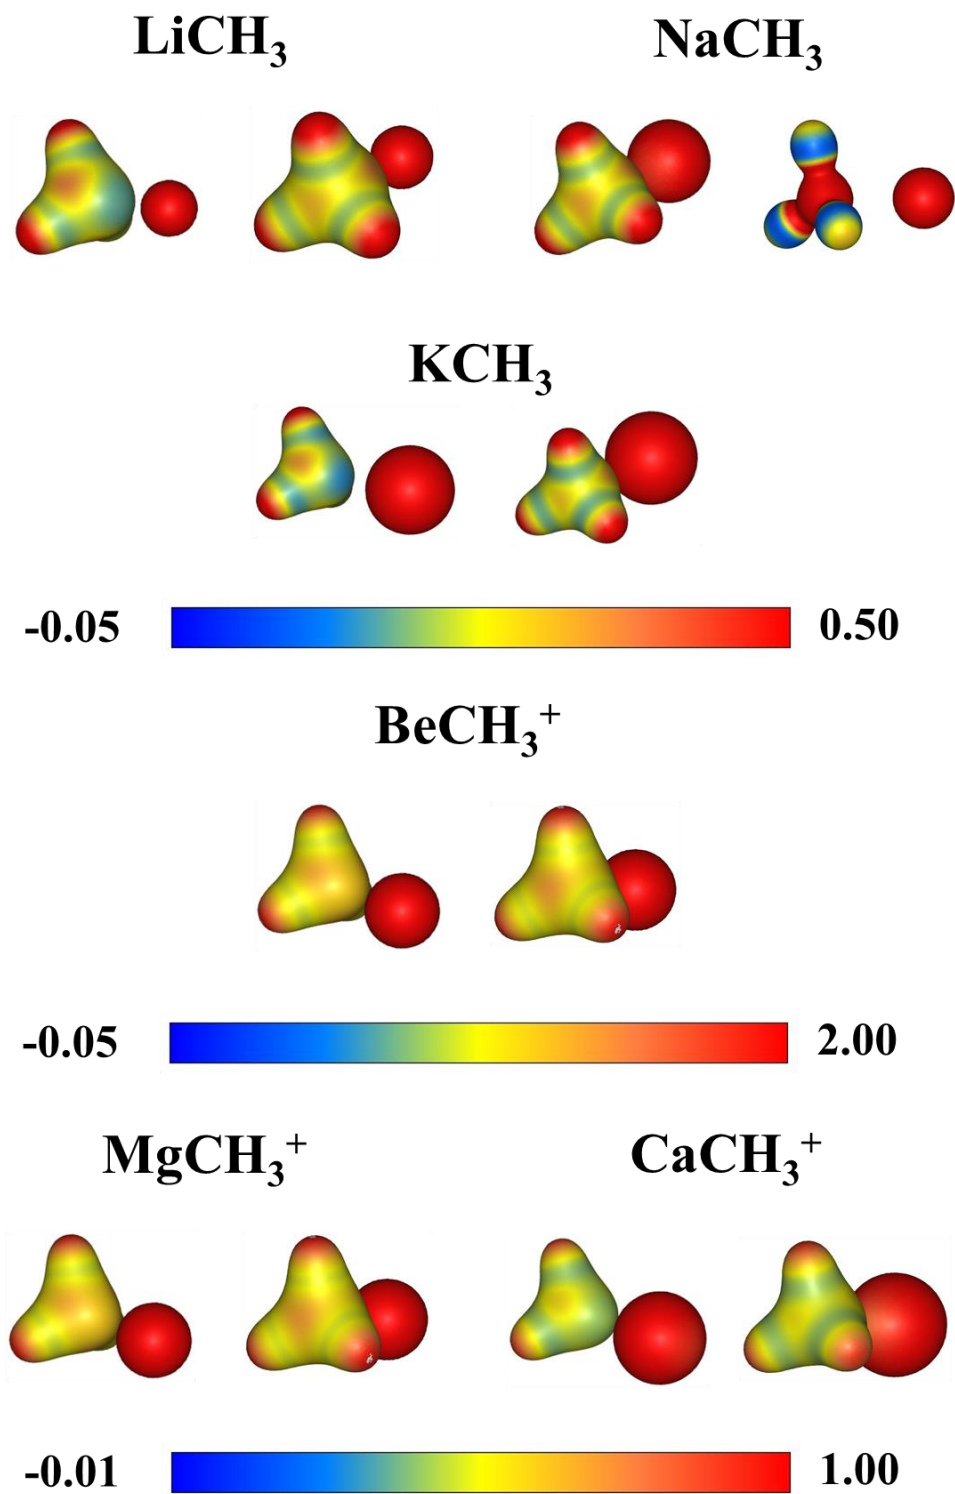

**Figure S4.** Electrostatic potential maps (in a.u.) of  $(M^{n+}CH_3)^{n-1}$  ( $M = \text{Li, Na, K, Be, Mg, and Ca}$ ).

Density isovalue: 0.10 a.u.

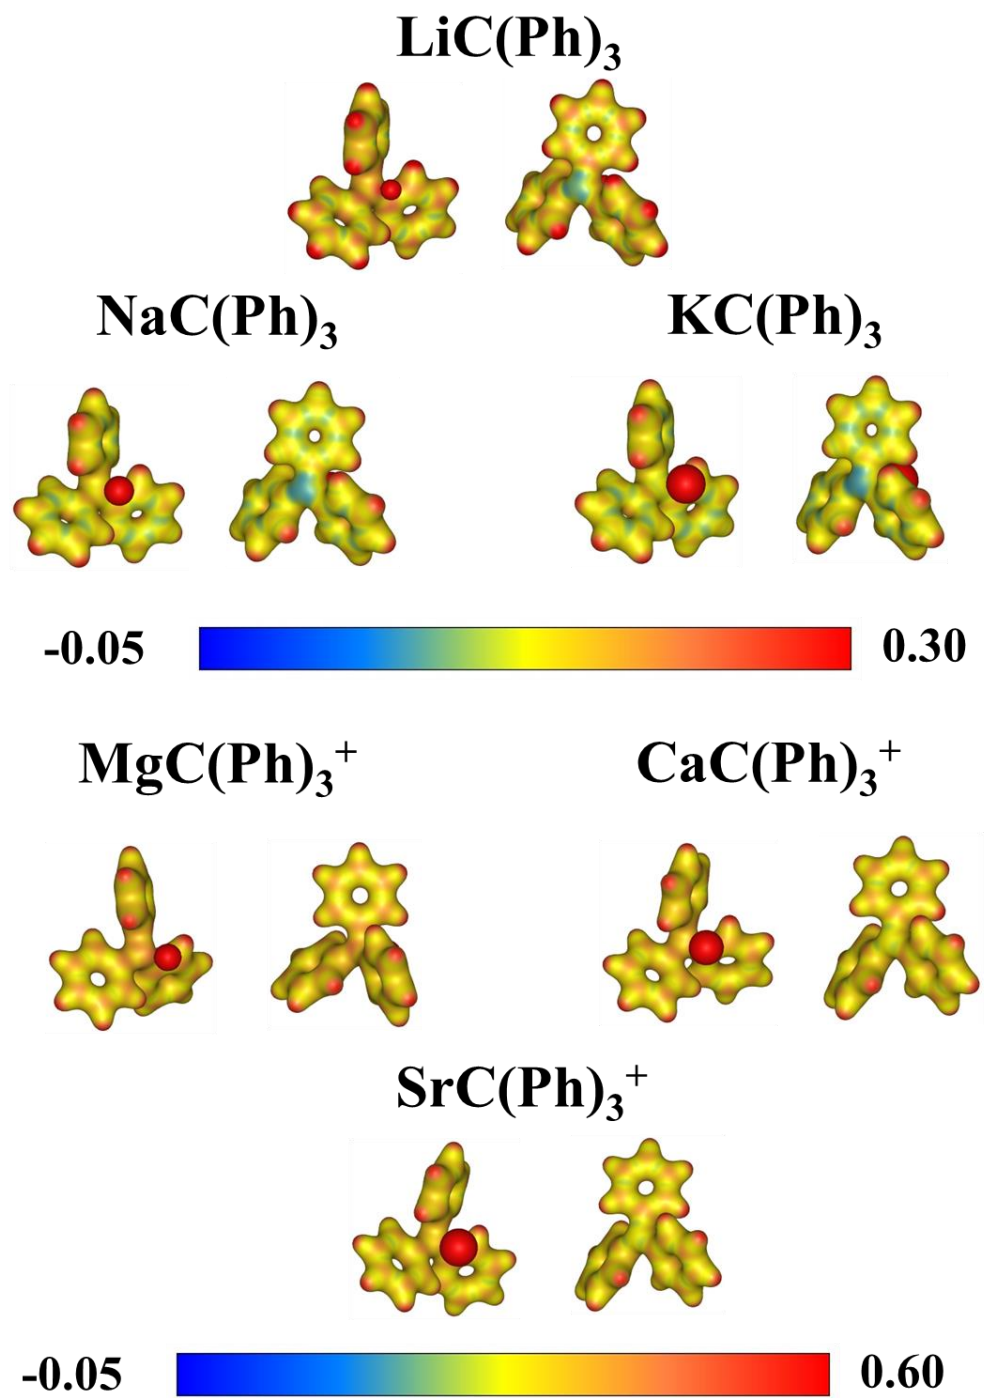

**Figure S5.** Electrostatic potential maps (in a.u.) of  $(M^{n+}C(Ph)_3)^{n-1}$  ( $M = Li, Na, K, Mg, Ca$  and  $Sr$ ). Density isovalues: 0.05 a.u. (for  $M = Li, Na, K$ ) and 0.06 (For  $M = Mg, Ca$  and  $Sr$ )



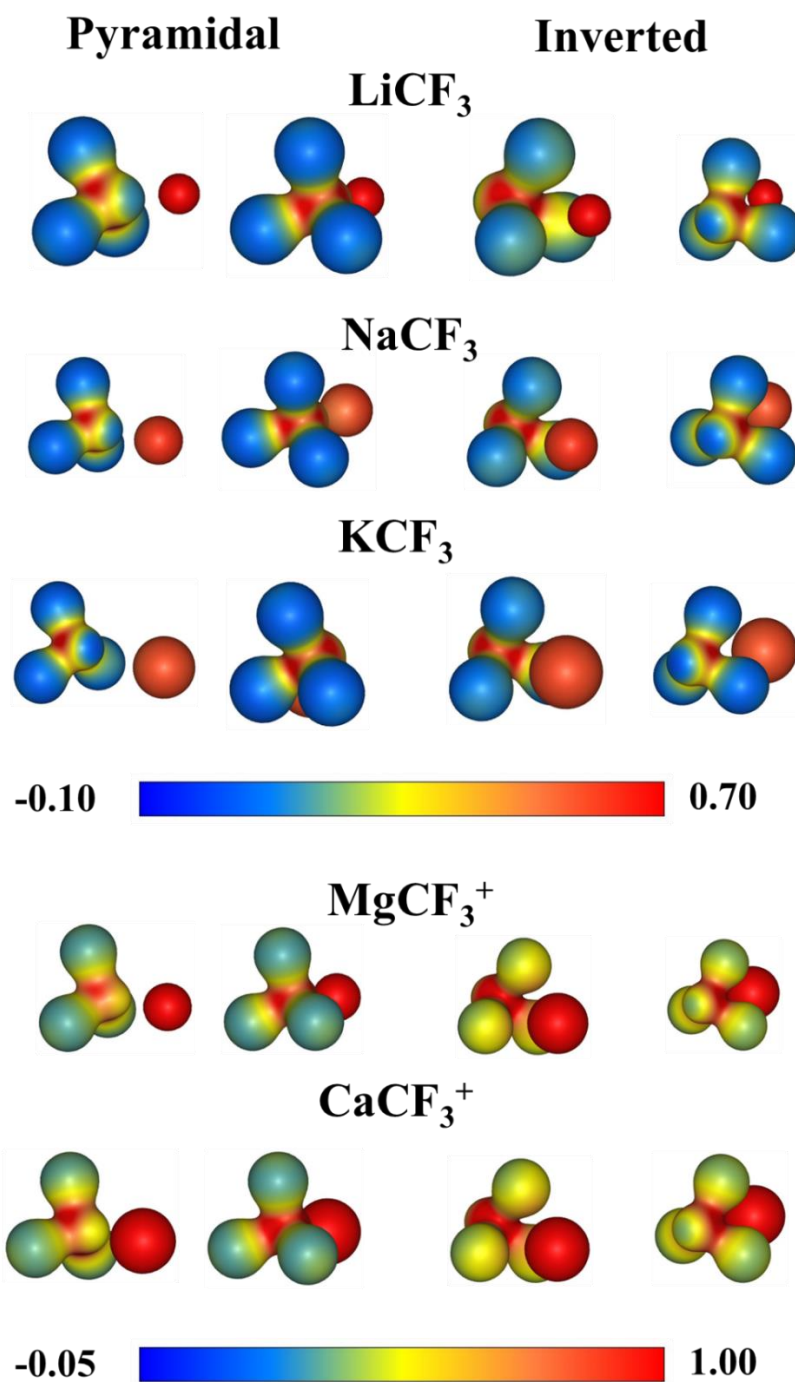

**Figure S6.** Electrostatic potential maps (in a.u) of pyramidal and inverted ( $M^{n+}CF_3^{n-1}$ ) structures (M = Li, Na, Mg and Ca). Density isovalue: 0.10 a.u.

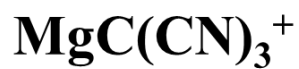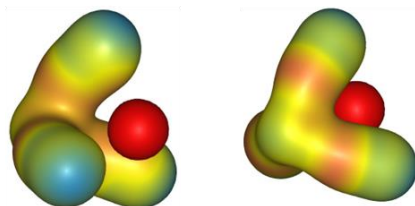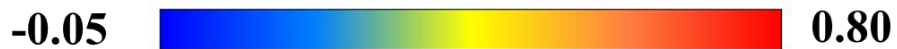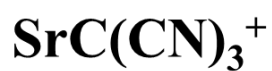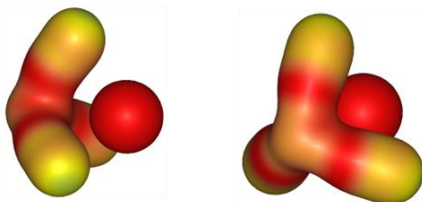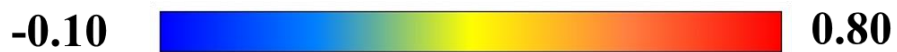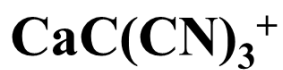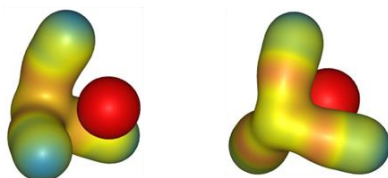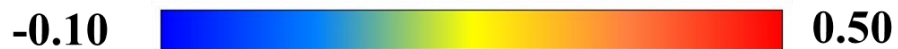

**Figure S7.** Electrostatic potential maps (in a.u.) of  $(\text{MC}(\text{CN})_3)^+$  structures (M = Mg, Ca and Sr).

Density isovalue: 0.05 a.u.

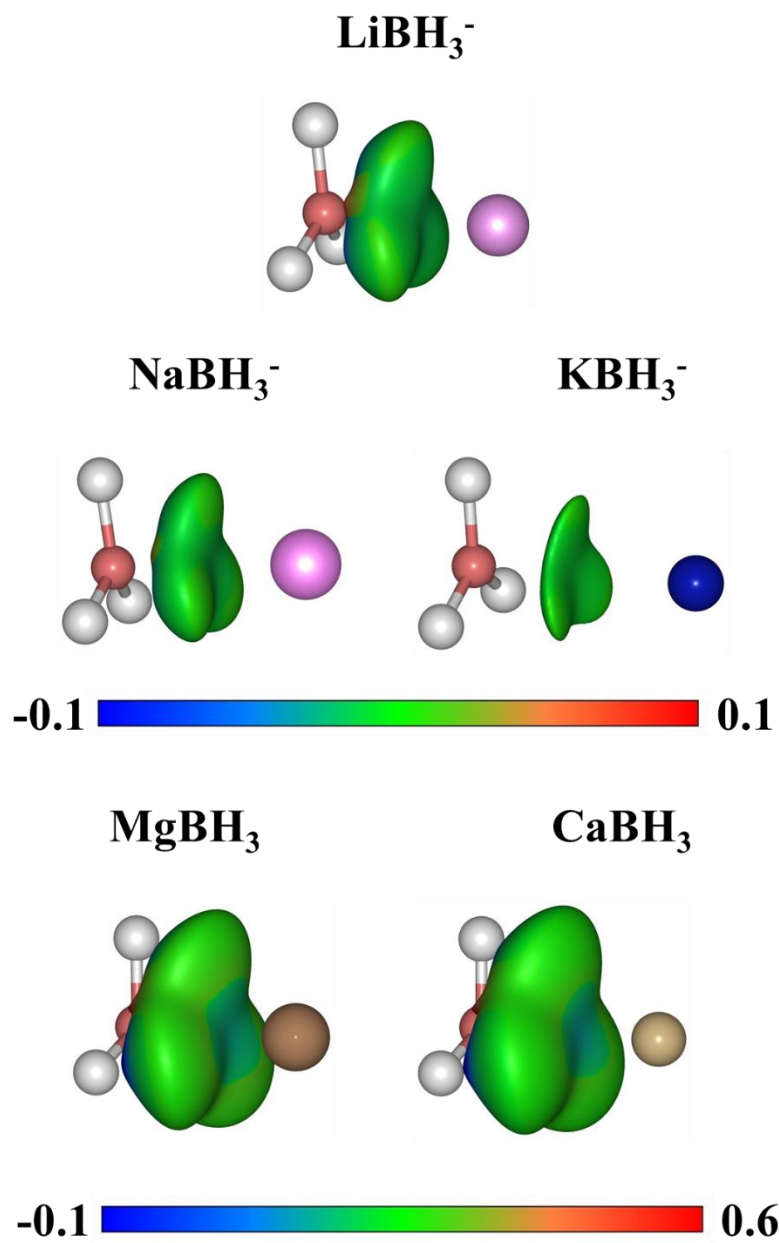

**Figure S8.** IGM plots (in a.u.) for  $(M^{n+}BH_3)^{n-2}$  ( $M = Li, Na, K, Mg$  and  $Ca$ ). Isovalue for  $\delta g^{inter} = 0.05$ .

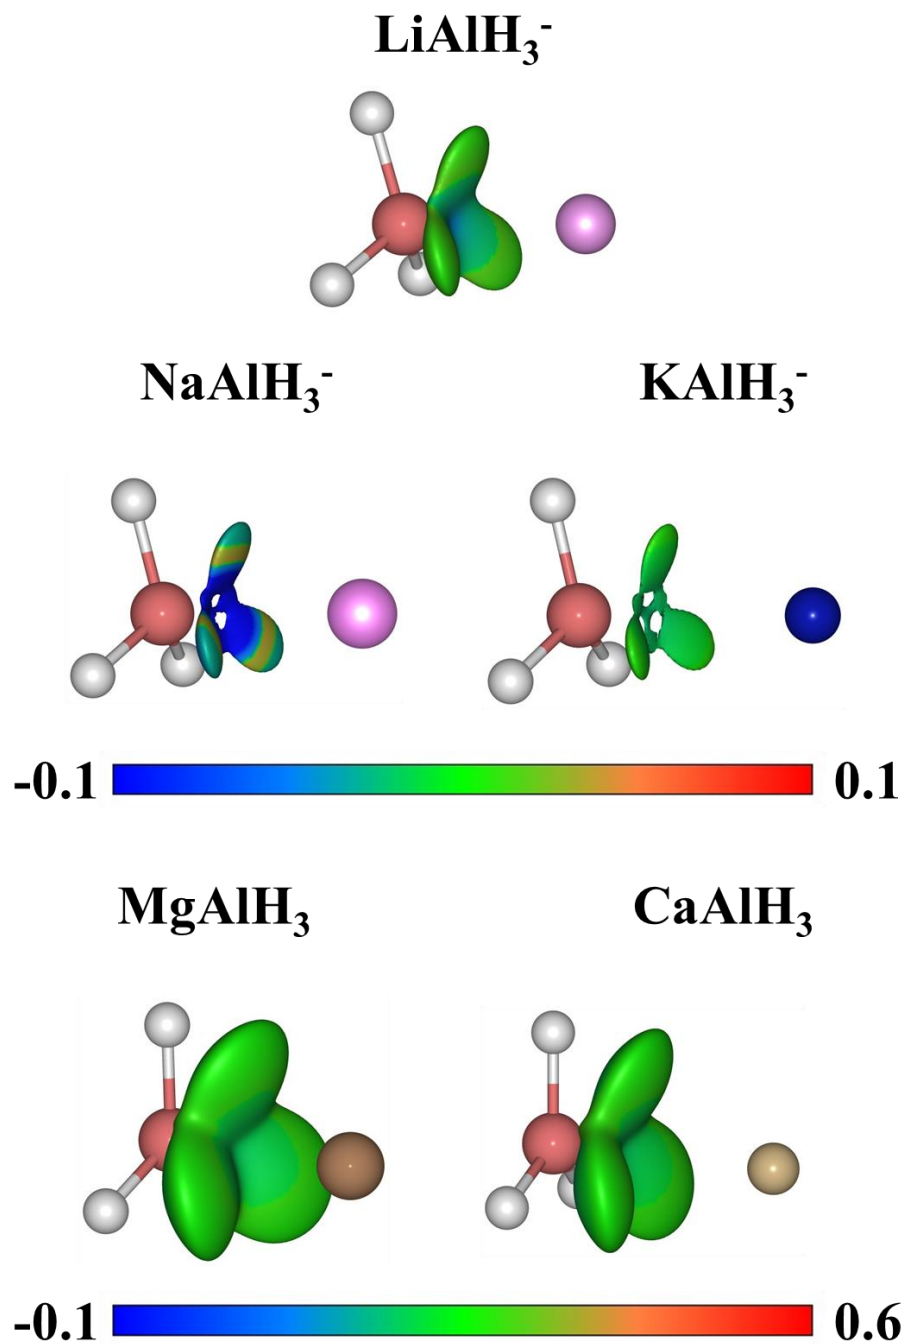

**Figure S9.** IGM plots (in a.u) for  $(M^{n+}AlH_3)^{n-2}$  ( $M = Li, Na, K, Mg$  and  $Ca$ ). Isovalue for  $\delta g^{inter} = 0.05$ .

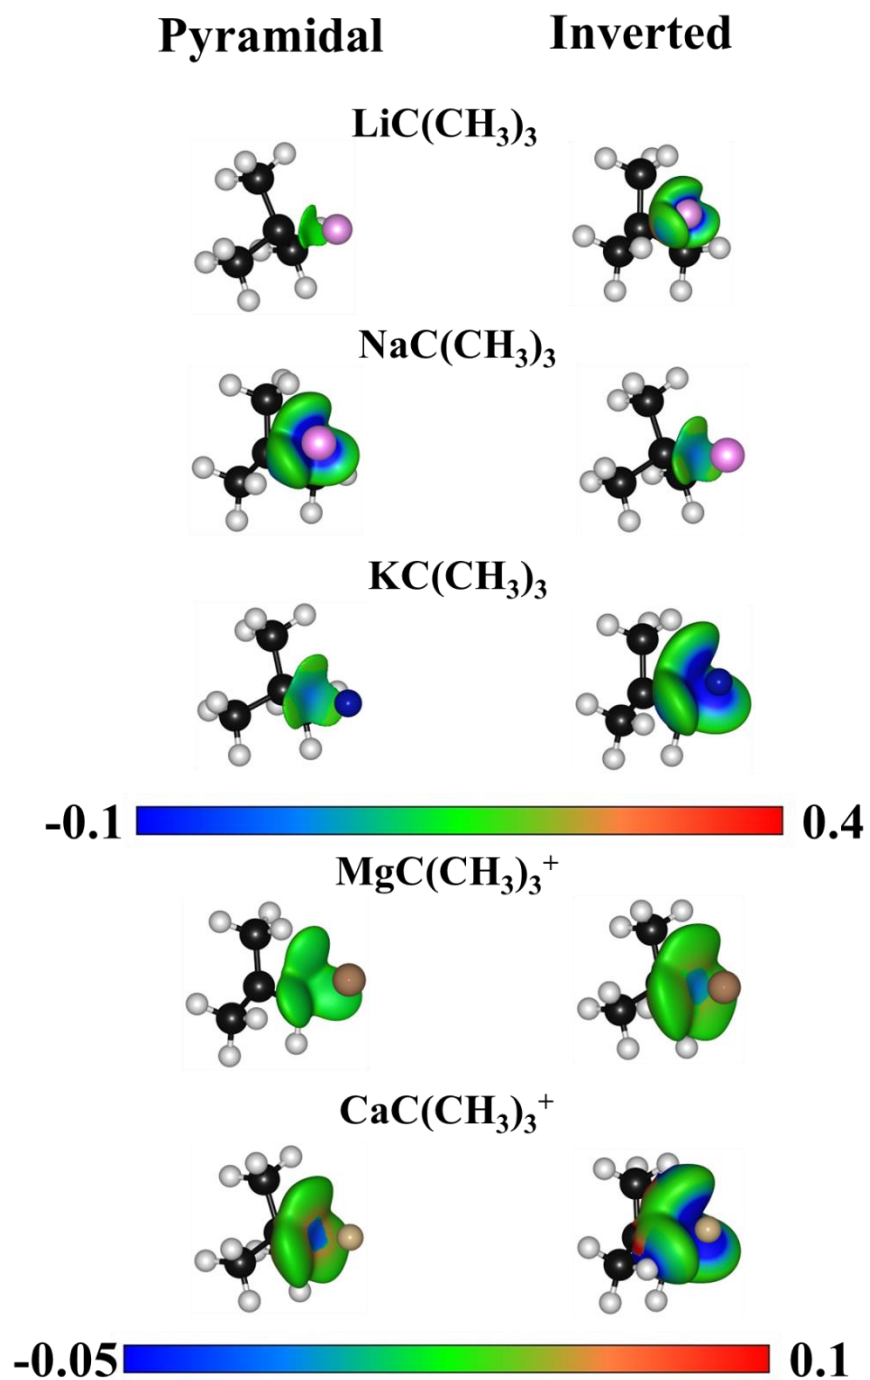

**Figure S10.** IGM plots (in a.u.) for pyramidal and inverted  $(M^{n+}C(CH_3)_3)^{n-1}$  structures ( $M = Li, Na, K, Mg$  and  $Ca$ ). Isovalue for  $\delta g^{inter} = 0.1$ .

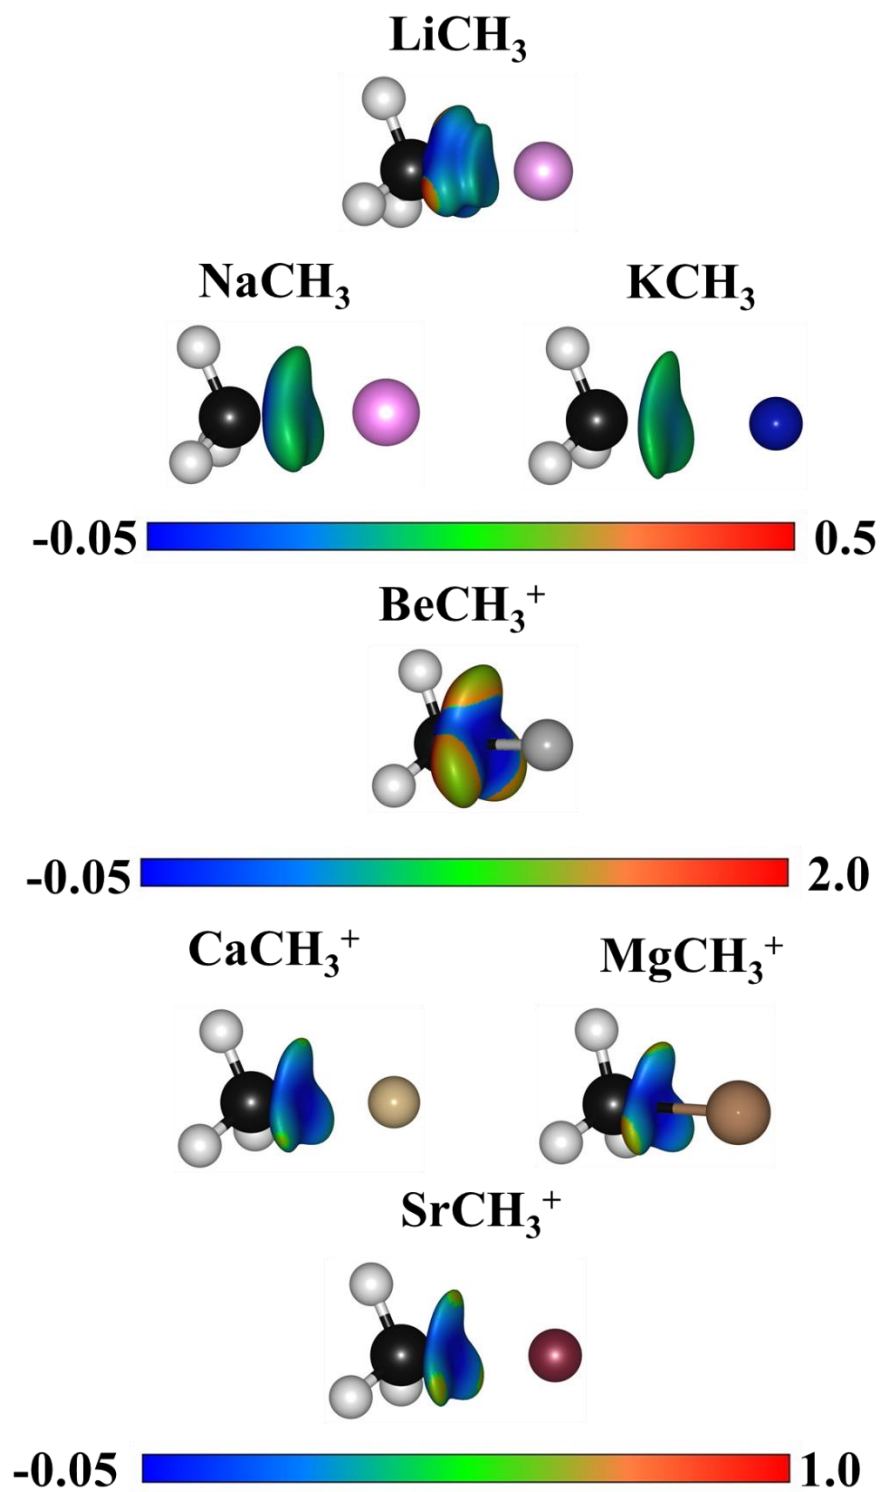

**Figure S11.** IGM plots (in a.u.) for  $(M^{n+}CH_3)^{n-1}$  ( $M = Li, Na, K, Be, Mg, Ca$  and  $Sr$ ). Isovalue for  $\delta g^{inter} = 0.1$ .

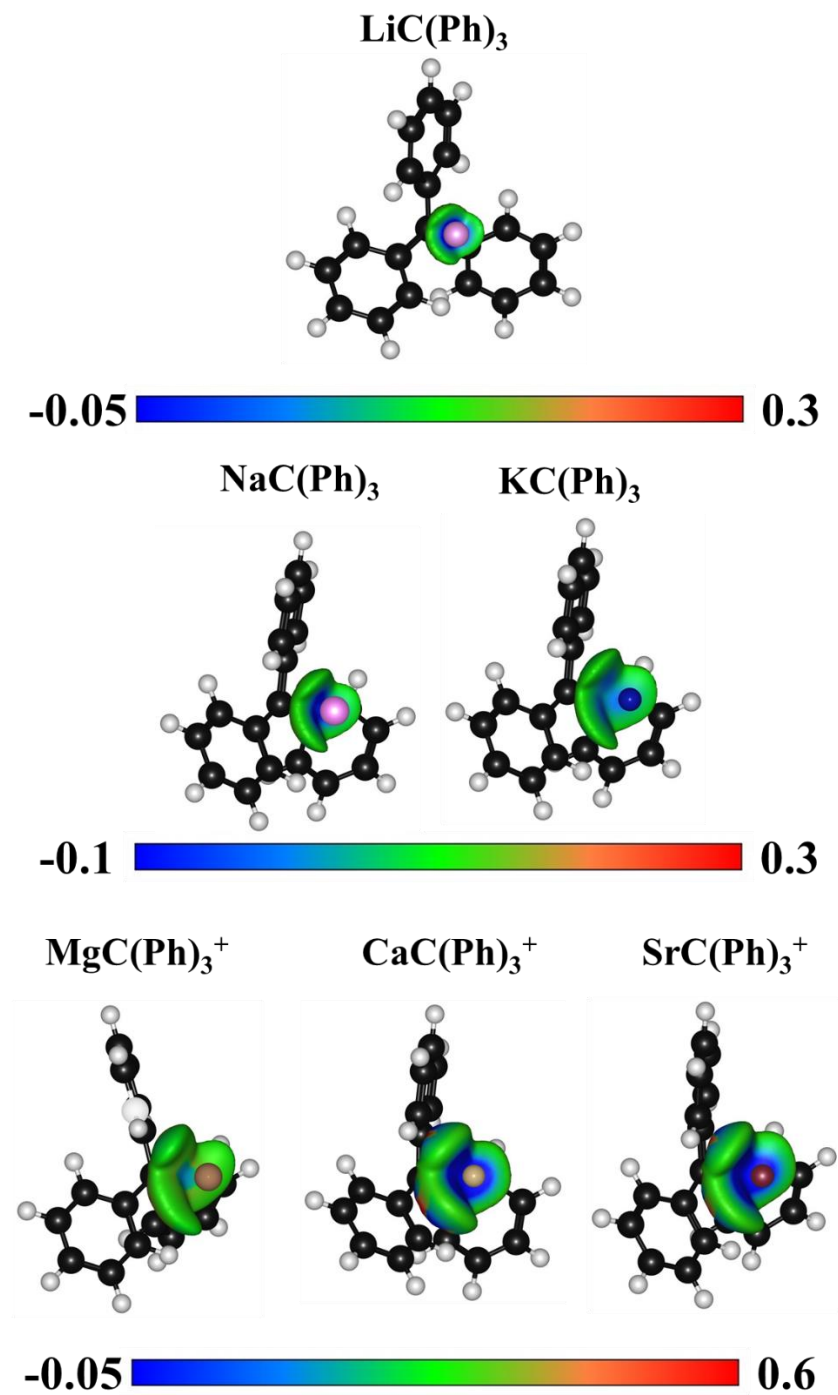

**Figure S12.** IGM plots (in a.u.) for  $(M^{n+}C(Ph)_3)^{n-1}$  ( $M = Li, Na, K, Mg, Ca$  and  $Sr$ ). Isovalues for  $\delta g^{inter} = 0.05$  ( $M = Li$ ),  $0.04$  ( $M = Na, K$ ) and  $0.06$  ( $M = Mg, Ca, Sr$ ).

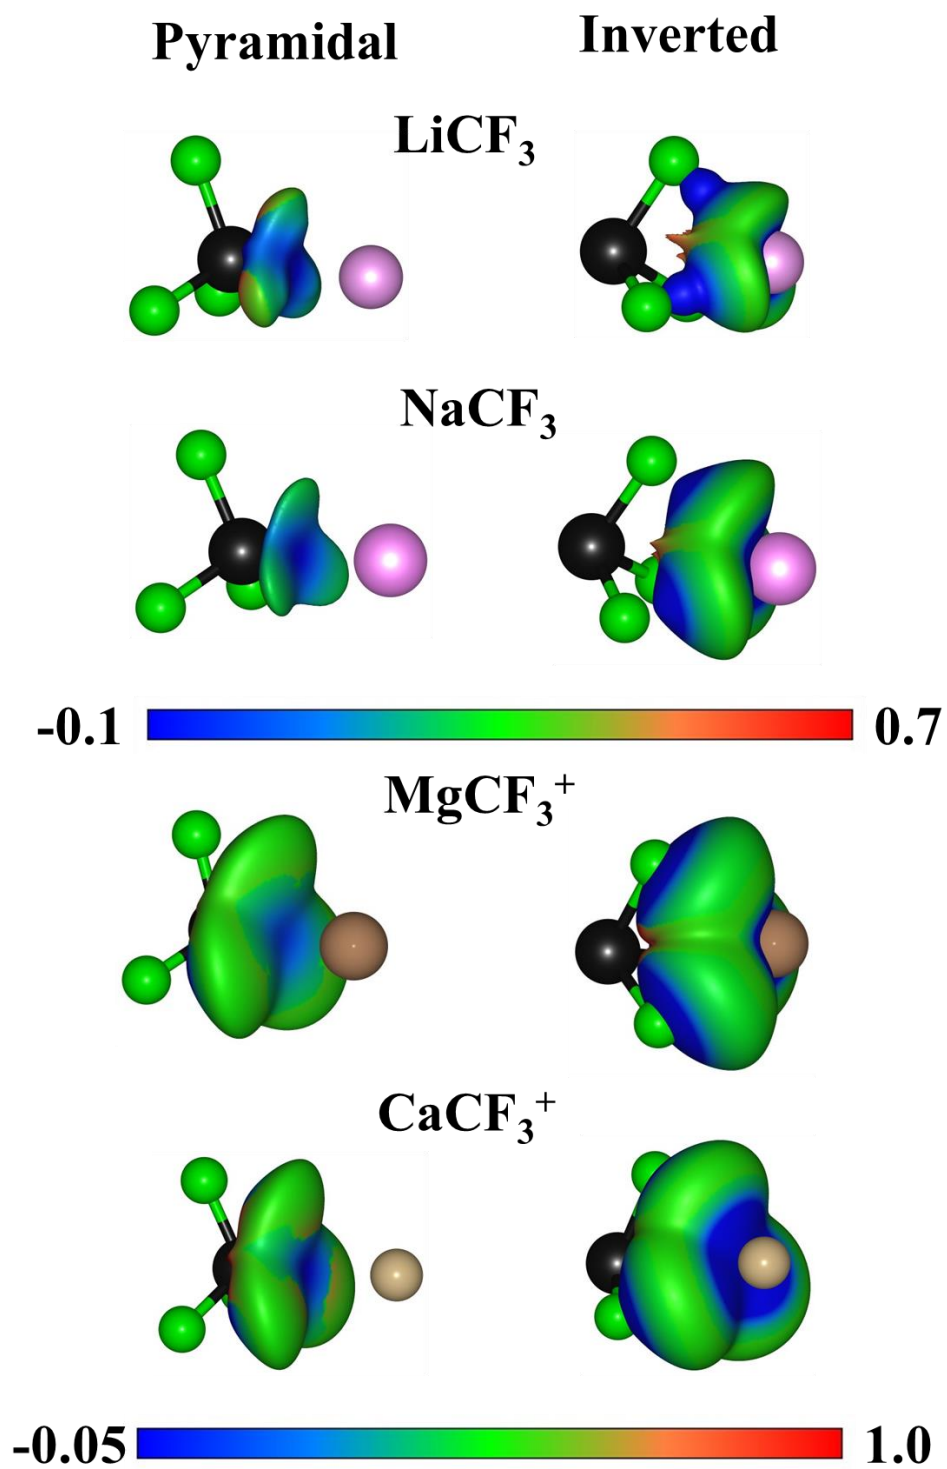

**Figure S13.** IGM plots (in.a.u.) for pyramidal and inverted  $(M^{n+}CF_3)^{n-1}$  structures ( $M = Li, Na, Mg$  and  $Ca$ ). Isovalue for  $\delta g^{inter} = 0.05$ .



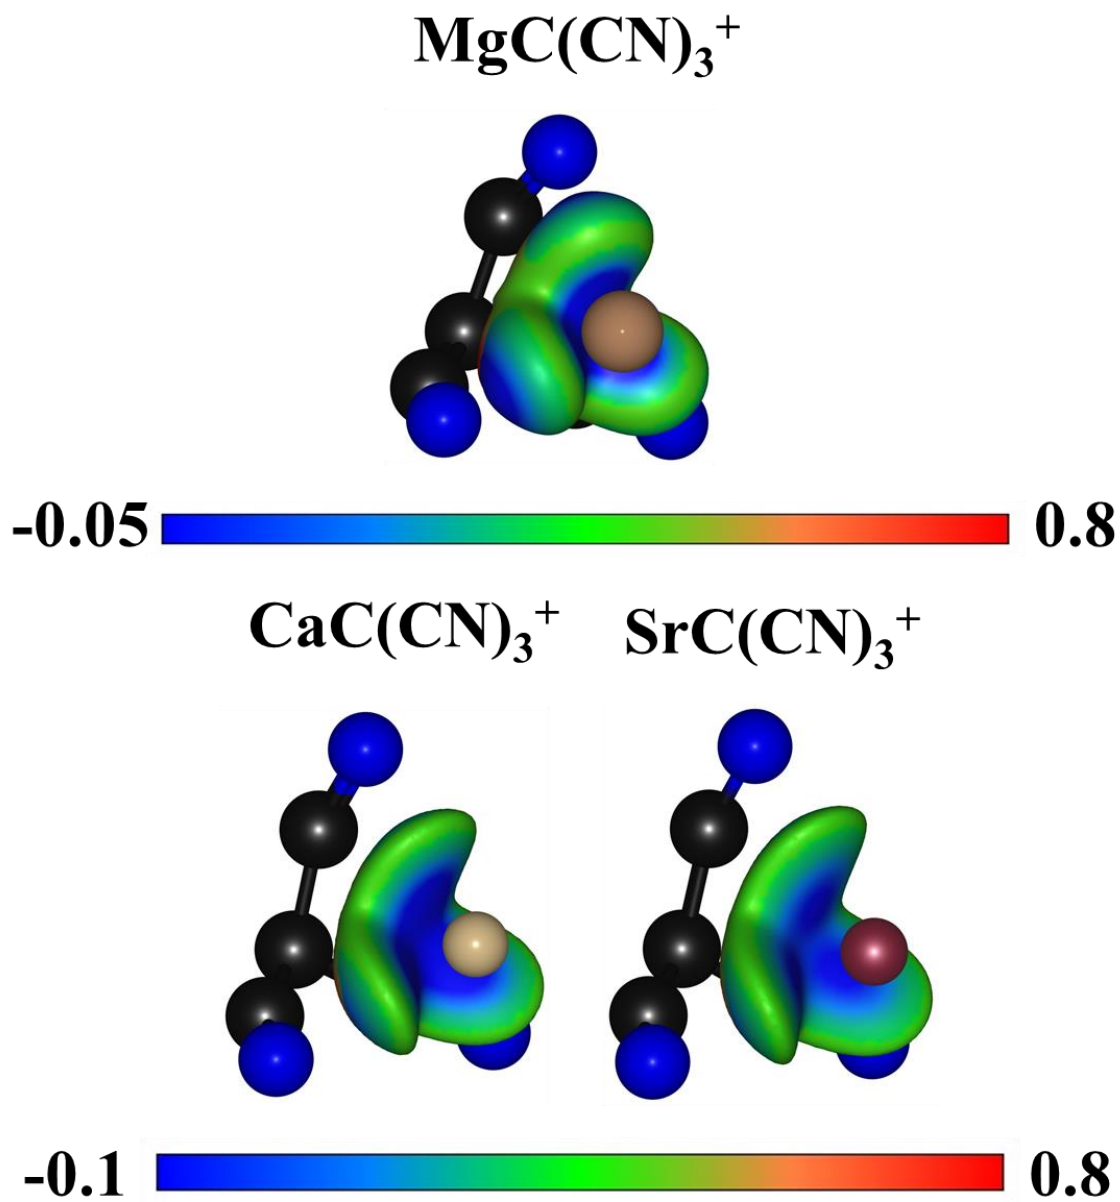

**Figure S14.** IGM plots (in a.u.) of inverted  $(\text{MC}(\text{CN})_3)^+$  structures ( $\text{M} = \text{Mg}, \text{Ca}$  and  $\text{Sr}$ ). Isovalue for  $\delta g^{\text{inter}} = 0.05$ .

**Table S1.** IBSI values for M···C and M···H interactions in inverted and pyramidal conformers of LiC(CH<sub>3</sub>)<sub>3</sub>.

| IBSI  |       | ( <i>p</i> )LiC(CH <sub>3</sub> ) <sub>3</sub> | ( <i>i</i> )LiC(CH <sub>3</sub> ) <sub>3</sub> |
|-------|-------|------------------------------------------------|------------------------------------------------|
| 1(Li) | 2(C)  | 0.12978                                        | 0.15967                                        |
| 1(Li) | 3(C)  | 0.03792                                        | 0.10543                                        |
| 1(Li) | 4(H)  | 0.01862                                        | 0.10378                                        |
| 1(Li) | 5(H)  | 0.00624                                        | 0.02539                                        |
| 1(Li) | 6(C)  | 0.03795                                        | 0.10545                                        |
| 1(Li) | 7(H)  | 0.00625                                        | 0.02539                                        |
| 1(Li) | 8(H)  | 0.01865                                        | 0.1038                                         |
| 1(Li) | 9(C)  | 0.03799                                        | 0.10545                                        |
| 1(Li) | 10(H) | 0.00625                                        | 0.0254                                         |
| 1(Li) | 11(H) | 0.01867                                        | 0.02539                                        |
| 1(Li) | 12(H) | 0.01866                                        | 0.10381                                        |
| 1(Li) | 13(H) | 0.01862                                        | 0.02539                                        |
| 1(Li) | 14(H) | 0.01863                                        | 0.0254                                         |

**Table S2.** IBSI values for M···C and M···H interactions in inverted and pyramidal conformers of NaC(CH<sub>3</sub>)<sub>3</sub>.

| IBSI  |       | ( <i>p</i> )NaC(CH <sub>3</sub> ) <sub>3</sub> | ( <i>i</i> )NaC(CH <sub>3</sub> ) <sub>3</sub> |
|-------|-------|------------------------------------------------|------------------------------------------------|
| 1(Na) | 2(C)  | 0.11278                                        | 0.08549                                        |
| 1(Na) | 3(C)  | 0.02876                                        | 0.06658                                        |
| 1(Na) | 4(H)  | 0.01434                                        | 0.09514                                        |
| 1(Na) | 5(H)  | 0.0044                                         | 0.01441                                        |
| 1(Na) | 6(C)  | 0.02878                                        | 0.06644                                        |
| 1(Na) | 7(H)  | 0.0044                                         | 0.01438                                        |
| 1(Na) | 8(H)  | 0.01437                                        | 0.09488                                        |
| 1(Na) | 9(C)  | 0.02881                                        | 0.06654                                        |
| 1(Na) | 10(H) | 0.00441                                        | 0.01443                                        |
| 1(Na) | 11(H) | 0.01438                                        | 0.01437                                        |
| 1(Na) | 12(H) | 0.01438                                        | 0.09511                                        |
| 1(Na) | 13(H) | 0.01434                                        | 0.01441                                        |
| 1(Na) | 14(H) | 0.01435                                        | 0.01438                                        |

**Table S3.** IBSI values for M···C and M···H interactions in inverted and pyramidal conformers of KC(CH<sub>3</sub>)<sub>3</sub>.

| IBSI |       | ( <i>p</i> )KC(CH <sub>3</sub> ) <sub>3</sub> | ( <i>i</i> )KC(CH <sub>3</sub> ) <sub>3</sub> |
|------|-------|-----------------------------------------------|-----------------------------------------------|
| 1(K) | 2(C)  | 0.08371                                       | 0.0856                                        |
| 1(K) | 3(C)  | 0.02028                                       | 0.05666                                       |
| 1(K) | 4(H)  | 0.01057                                       | 0.07744                                       |
| 1(K) | 5(H)  | 0.00342                                       | 0.01087                                       |
| 1(K) | 6(C)  | 0.02031                                       | 0.05659                                       |
| 1(K) | 7(H)  | 0.00342                                       | 0.01082                                       |
| 1(K) | 8(H)  | 0.01059                                       | 0.07735                                       |
| 1(K) | 9(C)  | 0.02038                                       | 0.05657                                       |
| 1(K) | 10(H) | 0.00343                                       | 0.01087                                       |
| 1(K) | 11(H) | 0.01062                                       | 0.01083                                       |
| 1(K) | 12(H) | 0.01061                                       | 0.0773                                        |
| 1(K) | 13(H) | 0.01055                                       | 0.01085                                       |
| 1(K) | 14(H) | 0.01056                                       | 0.01089                                       |

**Table S4.** IBSI values for M···C and M···H interactions in inverted and pyramidal conformers of BeC(CH<sub>3</sub>)<sub>3</sub><sup>+</sup>.

| IBSI  |       | ( <i>p</i> )BeC(CH <sub>3</sub> ) <sub>3</sub> <sup>+</sup> | ( <i>i</i> )BeC(CH <sub>3</sub> ) <sub>3</sub> <sup>+</sup> |
|-------|-------|-------------------------------------------------------------|-------------------------------------------------------------|
| 1(Be) | 2(C)  | 0.40635                                                     | 0.47065                                                     |
| 1(Be) | 3(C)  | 0.09929                                                     | 0.34214                                                     |
| 1(Be) | 4(H)  | 0.03352                                                     | 0.33257                                                     |
| 1(Be) | 5(H)  | 0.00945                                                     | 0.0546                                                      |
| 1(Be) | 6(C)  | 0.09929                                                     | 0.3421                                                      |
| 1(Be) | 7(H)  | 0.00945                                                     | 0.0546                                                      |
| 1(Be) | 8(H)  | 0.03354                                                     | 0.33241                                                     |
| 1(Be) | 9(C)  | 0.09929                                                     | 0.34215                                                     |
| 1(Be) | 10(H) | 0.00945                                                     | 0.05458                                                     |
| 1(Be) | 11(H) | 0.03352                                                     | 0.05461                                                     |
| 1(Be) | 12(H) | 0.03354                                                     | 0.33245                                                     |
| 1(Be) | 13(H) | 0.03355                                                     | 0.05462                                                     |
| 1(Be) | 14(H) | 0.03352                                                     | 0.05458                                                     |

**Table S5.** IBSI values for M···C and M···H interactions in inverted and pyramidal conformers of MgC(CH<sub>3</sub>)<sub>3</sub><sup>+</sup>.

| IBSI  |        | ( <i>p</i> )MgC(CH <sub>3</sub> ) <sub>3</sub> <sup>+</sup> | ( <i>i</i> )MgC(CH <sub>3</sub> ) <sub>3</sub> <sup>+</sup> |
|-------|--------|-------------------------------------------------------------|-------------------------------------------------------------|
| 1(Mg) | 2(C )  | 0.21368                                                     | 0.01662                                                     |
| 1(Mg) | 3(C )  | 0.06246                                                     | 0.01346                                                     |
| 1(Mg) | 4(H )  | 0.02596                                                     | 0.03551                                                     |
| 1(Mg) | 5(H )  | 0.00664                                                     | 0.00275                                                     |
| 1(Mg) | 6(C )  | 0.06246                                                     | 0.01346                                                     |
| 1(Mg) | 7(H )  | 0.00664                                                     | 0.00274                                                     |
| 1(Mg) | 8(H )  | 0.02598                                                     | 0.03553                                                     |
| 1(Mg) | 9(C )  | 0.06247                                                     | 0.01355                                                     |
| 1(Mg) | 10(H ) | 0.00664                                                     | 0.00275                                                     |
| 1(Mg) | 11(H ) | 0.02597                                                     | 0.00277                                                     |
| 1(Mg) | 12(H ) | 0.026                                                       | 0.03588                                                     |
| 1(Mg) | 13(H ) | 0.026                                                       | 0.00272                                                     |
| 1(Mg) | 14(H ) | 0.02598                                                     | 0.00273                                                     |

**Table S6.** IBSI values for M···C and M···H interactions in inverted and pyramidal conformers of MgC(CH<sub>3</sub>)<sub>3</sub><sup>+</sup>.

| IBSI  |        | ( <i>p</i> )CaC(CH <sub>3</sub> ) <sub>3</sub> <sup>+</sup> | ( <i>i</i> )CaC(CH <sub>3</sub> ) <sub>3</sub> <sup>+</sup> |
|-------|--------|-------------------------------------------------------------|-------------------------------------------------------------|
| 1(Ca) | 2(C )  | 0.23046                                                     | 0.24104                                                     |
| 1(Ca) | 3(C )  | 0.0566                                                      | 0.12325                                                     |
| 1(Ca) | 4(H )  | 0.02592                                                     | 0.12646                                                     |
| 1(Ca) | 5(H )  | 0.00781                                                     | 0.02375                                                     |
| 1(Ca) | 6(C )  | 0.05656                                                     | 0.12316                                                     |
| 1(Ca) | 7(H )  | 0.0078                                                      | 0.02358                                                     |
| 1(Ca) | 8(H )  | 0.02591                                                     | 0.12638                                                     |
| 1(Ca) | 9(C )  | 0.05657                                                     | 0.12315                                                     |
| 1(Ca) | 10(H ) | 0.0078                                                      | 0.02368                                                     |
| 1(Ca) | 11(H ) | 0.0259                                                      | 0.02368                                                     |
| 1(Ca) | 12(H ) | 0.02592                                                     | 0.12635                                                     |
| 1(Ca) | 13(H ) | 0.02594                                                     | 0.02364                                                     |
| 1(Ca) | 14(H ) | 0.02591                                                     | 0.02379                                                     |

Cartesian Coordinates of all species

LiBH<sub>3</sub><sup>-</sup>

|   |              |              |              |
|---|--------------|--------------|--------------|
| 5 | 0.000000000  | 0.629209212  | 0.000000000  |
| 1 | 1.193759843  | 0.777298936  | 0.000000000  |
| 1 | -0.596880186 | 0.777298936  | 1.033830308  |
| 1 | -0.596880186 | 0.777298936  | -1.033830308 |
| 3 | 0.000000000  | -1.825981132 | 0.000000000  |

NaBH<sub>3</sub><sup>-</sup>

|    |              |              |              |
|----|--------------|--------------|--------------|
| 5  | 0.000000000  | -1.555240822 | 0.000000000  |
| 1  | -1.194240336 | -1.672850466 | 0.000000000  |
| 1  | 0.597119904  | -1.672850466 | 1.034239891  |
| 1  | 0.597119904  | -1.672850466 | -1.034239891 |
| 11 | 0.000000000  | 1.163159640  | 0.000000000  |

KBH<sub>3</sub><sup>-</sup>

|    |              |              |              |
|----|--------------|--------------|--------------|
| 5  | 0.000000000  | 0.000000000  | -2.301160076 |
| 1  | 0.000000000  | 1.193879967  | -2.346009965 |
| 1  | -1.033930322 | -0.596939983 | -2.346009965 |
| 1  | 1.033930322  | -0.596939983 | -2.346009965 |
| 19 | 0.000000000  | 0.000000000  | 0.975990176  |

MgBH<sub>3</sub>

|    |              |              |              |
|----|--------------|--------------|--------------|
| 5  | 0.000000529  | -1.428261037 | 0.000000000  |
| 1  | -1.191969637 | -1.498001307 | 0.000000000  |
| 1  | 0.595980585  | -1.498001307 | 1.032270293  |
| 1  | 0.595980585  | -1.498001307 | -1.032270293 |
| 12 | 0.000000529  | 0.969608827  | 0.000000000  |

CaBH<sub>3</sub>

|    |              |              |              |
|----|--------------|--------------|--------------|
| 5  | -0.000000529 | -1.911028912 | 0.000000000  |
| 1  | -1.194890695 | -1.967628652 | 0.000000000  |
| 1  | 0.597449581  | -1.967628652 | 1.034809815  |
| 1  | 0.597449581  | -1.967628652 | -1.034809815 |
| 20 | -0.000000529 | 0.772901473  | 0.000000000  |

LiAlH<sub>3</sub><sup>-</sup>

|    |              |              |              |
|----|--------------|--------------|--------------|
| 13 | 0.000000529  | 0.380234491  | 0.000000000  |
| 1  | 1.548190594  | 0.831644381  | 0.000000000  |
| 1  | -0.774099530 | 0.831644381  | 1.340770046  |
| 1  | -0.774099530 | 0.831644381  | -1.340770046 |
| 3  | 0.000000529  | -2.479326118 | 0.000000000  |

NaAlH<sub>3</sub><sup>-</sup>

|    |              |              |              |
|----|--------------|--------------|--------------|
| 13 | 0.000000529  | 1.213252087  | 0.000000000  |
| 1  | 1.554850289  | 1.611772298  | 0.000000000  |
| 1  | -0.777429643 | 1.611772298  | 1.346540194  |
| 1  | -0.777429643 | 1.611772298  | -1.346540194 |
| 11 | 0.000000529  | -1.873418168 | 0.000000000  |

KAlH<sub>3</sub><sup>-</sup>

|    |              |              |              |
|----|--------------|--------------|--------------|
| 13 | 0.000000000  | -1.952399989 | 0.000000000  |
| 1  | -1.561440134 | -2.287520003 | 0.000000000  |
| 1  | 0.780720067  | -2.287520003 | 1.352250017  |
| 1  | 0.780720067  | -2.287520003 | -1.352250017 |
| 19 | 0.000000000  | 1.697040216  | 0.000000000  |

MgAlH<sub>3</sub>

|    |              |              |              |
|----|--------------|--------------|--------------|
| 13 | -0.000000529 | 1.282941556  | 0.000000000  |
| 1  | 1.575849630  | 1.361101565  | 0.000000000  |
| 1  | -0.787920582 | 1.361101565  | 1.364730133  |
| 1  | -0.787920582 | 1.361101565  | -1.364730133 |
| 12 | -0.000000529 | -1.730128611 | 0.000000000  |

CaAlH<sub>3</sub>

|    |              |              |              |
|----|--------------|--------------|--------------|
| 13 | 0.000000529  | -1.859670672 | 0.000000000  |
| 1  | -1.577209616 | -1.962360164 | 0.000000000  |
| 1  | 0.788600574  | -1.962360164 | 1.365900144  |
| 1  | 0.788600574  | -1.962360164 | -1.365900144 |
| 20 | 0.000000529  | 1.503139618  | 0.000000000  |

(*p*)LiC(CH<sub>3</sub>)<sub>3</sub>

|   |              |              |              |
|---|--------------|--------------|--------------|
| 6 | -0.000020109 | -0.000089960 | 0.291141151  |
| 3 | -0.003414781 | -0.001669554 | 2.303741403  |
| 6 | 1.392631533  | -0.295210524 | -0.264988683 |
| 1 | 1.767059891  | -1.276696206 | 0.041801298  |
| 1 | 1.385229931  | -0.292467270 | -1.371058564 |
| 6 | -0.439954261 | 1.353520571  | -0.265848596 |
| 1 | -0.436268012 | 1.345889306  | -1.371928531 |
| 1 | -1.455474506 | 1.622671233  | 0.040581545  |
| 6 | -0.951614684 | -1.057784574 | -0.267318650 |
| 1 | -0.944803644 | -1.051065611 | -1.373378477 |
| 1 | -1.989044456 | -0.891646202 | 0.038921516  |
| 1 | -0.677988242 | -2.071877629 | 0.039881443  |
| 1 | 2.133392367  | 0.448846026  | 0.043651302  |
| 1 | 0.221886666  | 2.168742466  | 0.042391331  |

(*i*)LiC(CH<sub>3</sub>)<sub>3</sub>

|   |              |              |              |
|---|--------------|--------------|--------------|
| 6 | -0.000036513 | -0.000008996 | -0.440371252 |
| 6 | 0.473093457  | 1.370038310  | -0.107945809 |

|   |              |              |              |
|---|--------------|--------------|--------------|
| 1 | 0.562507478  | 1.629139367  | 1.020941137  |
| 1 | 1.478724438  | 1.570906585  | -0.476770709 |
| 6 | -1.423063987 | -0.275304464 | -0.107991318 |
| 1 | -1.763624473 | -1.242526702 | -0.477040590 |
| 1 | -1.692124689 | -0.327712591 | 1.020888749  |
| 6 | 0.949989581  | -1.094678283 | -0.108011427 |
| 1 | 1.957976988  | -0.905656169 | -0.476677045 |
| 1 | 0.621364159  | -2.066037629 | -0.477017306 |
| 1 | 1.129538363  | -1.301854351 | 1.020858586  |
| 1 | -0.194387441 | 2.148579754  | -0.476810398 |
| 1 | -2.099758390 | 0.495316784  | -0.476663286 |
| 3 | -0.000036513 | -0.000144465 | 1.461403408  |

(*p*)NaC(CH<sub>3</sub>)<sub>3</sub>

|    |              |              |              |
|----|--------------|--------------|--------------|
| 6  | -0.225049559 | -0.000049743 | -0.000251359 |
| 11 | 2.121510750  | -0.000347140 | -0.001058884 |
| 6  | -0.762006243 | -1.166177538 | -0.818607570 |
| 1  | -0.449587932 | -2.135812824 | -0.421100734 |
| 1  | -1.869895964 | -1.165634602 | -0.817603721 |
| 6  | -0.760867453 | 1.292605391  | -0.600093350 |
| 1  | -1.868757175 | 1.293018149  | -0.598959324 |
| 1  | -0.447442648 | 2.176631440  | -0.037898087 |
| 6  | -0.759115347 | -0.126033087 | 1.419942900  |
| 1  | -1.867015653 | -0.125860046 | 1.421316644  |
| 1  | -0.445750868 | 0.703110931  | 2.060398716  |
| 1  | -0.446186910 | -1.055195310 | 1.904241685  |
| 1  | -0.450399161 | -1.121584300 | -1.865835058 |
| 1  | -0.449350332 | 1.433073904  | -1.638858765 |

(*i*)NaC(CH<sub>3</sub>)<sub>3</sub>

|    |              |              |              |
|----|--------------|--------------|--------------|
| 6  | -0.823151615 | 0.001006495  | -0.001821957 |
| 6  | -0.534043034 | 1.403722559  | -0.353104103 |
| 1  | 0.584517018  | 1.702303413  | -0.425651658 |
| 1  | -0.915342230 | 1.683621339  | -1.335966704 |
| 6  | -0.540990602 | -0.396128859 | 1.390034860  |
| 1  | -0.926839135 | -1.386182450 | 1.636397033  |
| 1  | 0.576116859  | -0.482150854 | 1.690071481  |
| 6  | -0.535608340 | -1.005891336 | -1.040153447 |
| 1  | -0.915343817 | -0.723827162 | -2.023001760 |
| 1  | -0.922950211 | -1.995070197 | -0.792657776 |
| 1  | 0.582654843  | -1.223899663 | -1.257999845 |
| 1  | -0.918808870 | 2.113813338  | 0.380059334  |
| 1  | -0.926272915 | 0.315032975  | 2.121879058  |
| 11 | 1.671366123  | -0.001808728 | 0.003376151  |

(*p*)KC(CH<sub>3</sub>)<sub>3</sub>

|   |              |              |              |
|---|--------------|--------------|--------------|
| 6 | -0.682791583 | -0.000101602 | -0.000483668 |
|---|--------------|--------------|--------------|

|    |              |              |              |
|----|--------------|--------------|--------------|
| 19 | 2.044298498  | -0.000223842 | -0.000950402 |
| 6  | -1.234073095 | -1.170146896 | -0.802451789 |
| 1  | -0.925423056 | -2.139713389 | -0.397817464 |
| 1  | -2.345213553 | -1.171992137 | -0.802017864 |
| 6  | -1.232542186 | 1.280834372  | -0.611272749 |
| 1  | -2.343682114 | 1.284025840  | -0.610299063 |
| 1  | -0.922630588 | 2.175588961  | -0.061346460 |
| 6  | -1.229149630 | -0.110224975 | 1.415702602  |
| 1  | -2.340279504 | -0.110072572 | 1.420895419  |
| 1  | -0.919248616 | 0.725309917  | 2.052082695  |
| 1  | -0.920109588 | -1.034570627 | 1.914906194  |
| 1  | -0.927584745 | -1.141060669 | -1.853303612 |
| 1  | -0.926163375 | 1.414572280  | -1.654002760 |

(i)KC(CH<sub>3</sub>)<sub>3</sub>

|    |              |              |              |
|----|--------------|--------------|--------------|
| 6  | -1.096887069 | 0.000753548  | 0.000026988  |
| 6  | -0.915957134 | 1.466209396  | -0.046329997 |
| 1  | 0.158069478  | 1.883390513  | -0.058559813 |
| 1  | -1.354588980 | 1.910554769  | -0.942903898 |
| 6  | -0.917763216 | -0.692452772 | 1.292184166  |
| 1  | -1.361188879 | -1.691004420 | 1.292858867  |
| 1  | 0.155901968  | -0.894317488 | 1.658386993  |
| 6  | -0.918006108 | -0.772779762 | -1.245774263 |
| 1  | -1.355864827 | -0.271843645 | -2.112401493 |
| 1  | -1.360119941 | -1.769909511 | -1.182398408 |
| 1  | 0.155563294  | -0.996187284 | -1.599624505 |
| 1  | -1.356132590 | 1.966735930  | 0.819364294  |
| 1  | -1.353946559 | -0.136842062 | 2.125678550  |
| 19 | 1.619157496  | -0.000576803 | -0.000054505 |

(p)BeC(CH<sub>3</sub>)<sub>3</sub><sup>+</sup>

|   |              |              |              |
|---|--------------|--------------|--------------|
| 6 | -0.000003175 | 0.000010584  | 0.170920547  |
| 6 | 1.427492672  | 0.323416201  | -0.272657519 |
| 1 | 2.151208707  | -0.424259393 | 0.048846235  |
| 1 | 1.422684567  | 0.322600739  | -1.368628582 |
| 6 | -0.993837737 | 1.074560551  | -0.272595605 |
| 1 | -0.990838360 | 1.070749417  | -1.368565081 |
| 1 | -2.013553300 | 0.868098872  | 0.049433093  |
| 6 | -0.433685098 | -1.397941826 | -0.272659107 |
| 1 | -0.431829802 | -1.393448582 | -1.368634932 |
| 1 | -1.443099167 | -1.650788008 | 0.048729816  |
| 1 | 0.254927435  | -2.177834789 | 0.049410338  |
| 1 | 1.758548075  | 1.309783013  | 0.049257406  |
| 1 | -0.708143936 | 2.075151648  | 0.048862110  |
| 4 | 0.000073556  | -0.000081493 | 1.923310058  |



(i)BeC(CH<sub>3</sub>)<sub>3</sub><sup>+</sup>

|   |              |              |              |
|---|--------------|--------------|--------------|
| 6 | -0.000001058 | -0.000050801 | -0.558369841 |
| 6 | -0.120859321 | 1.409351946  | -0.126578669 |
| 1 | -0.127925954 | 1.493903358  | 1.113056609  |
| 1 | 0.730960472  | 2.044024913  | -0.349336890 |
| 6 | -1.160272978 | -0.809364431 | -0.126362235 |
| 1 | -1.102278326 | -1.870053659 | -0.349124690 |
| 1 | -1.230194755 | -0.857528028 | 1.112720581  |
| 6 | 1.281097902  | -0.600076417 | -0.126407745 |
| 1 | 2.170652266  | -0.019665814 | -0.349725306 |
| 1 | 1.404524262  | -1.655196583 | -0.348959587 |
| 1 | 1.358384769  | -0.635425457 | 1.112688301  |
| 1 | -1.068543277 | 1.889400909  | -0.349056426 |
| 1 | -2.135663596 | -0.388781233 | -0.349501993 |
| 4 | 0.000074085  | 0.000040217  | 1.095888511  |

(p)MgC(CH<sub>3</sub>)<sub>3</sub><sup>+</sup>

|    |              |              |              |
|----|--------------|--------------|--------------|
| 6  | 0.313579854  | 0.000010054  | 0.000001058  |
| 6  | 0.718902110  | -0.230555648 | 1.441078768  |
| 1  | 0.389240030  | -1.193728093 | 1.828515891  |
| 1  | 1.817242299  | -0.234110132 | 1.468399131  |
| 6  | 0.719003183  | 1.363268546  | -0.520941663 |
| 1  | 1.817343372  | 1.388988677  | -0.530739909 |
| 1  | 0.388768533  | 1.545528303  | -1.542823678 |
| 6  | 0.718724835  | -1.132853659 | -0.920184731 |
| 1  | 1.817054970  | -1.154753130 | -0.937182962 |
| 1  | 0.388870135  | -0.987024051 | -1.948009406 |
| 1  | 0.387842473  | -2.108778217 | -0.567246260 |
| 1  | 0.387919203  | 0.562819163  | 2.110031837  |
| 1  | 0.388739957  | 2.180505018  | 0.118992384  |
| 12 | -1.883690028 | 0.000111127  | 0.000028046  |

(i)MgC(CH<sub>3</sub>)<sub>3</sub><sup>+</sup>

|    |              |              |              |
|----|--------------|--------------|--------------|
| 6  | -1.131000480 | -0.000203204 | 0.001259442  |
| 6  | -0.984514692 | -0.973715243 | -1.062428104 |
| 1  | 0.137793522  | -1.031786625 | -1.132842546 |
| 1  | -1.326834692 | -1.973514162 | -0.811380597 |
| 6  | -0.983896084 | 1.407446379  | -0.310665146 |
| 1  | -1.327929560 | 2.082104508  | 0.468002771  |
| 1  | 0.138525374  | 1.495303032  | -0.332194193 |
| 6  | -0.978140752 | -0.434209512 | 1.375407342  |
| 1  | -1.323879237 | -1.444951817 | 1.572185607  |
| 1  | -1.319215069 | 0.282039832  | 2.117315433  |
| 1  | 0.144871268  | -0.462827418 | 1.456055543  |
| 1  | -1.334300325 | -0.638168183 | -2.034501840 |
| 1  | -1.331316294 | 1.690637701  | -1.300076844 |
| 12 | 2.667299932  | 0.000437630  | -0.002000290 |

(i)CaC(CH<sub>3</sub>)<sub>3</sub><sup>+</sup>

|    |              |              |              |
|----|--------------|--------------|--------------|
| 6  | -0.909372581 | 0.000440275  | -0.000421225 |
| 6  | -0.816881923 | 1.354575751  | -0.575694046 |
| 1  | 0.264878614  | 1.754940674  | -0.741671548 |
| 1  | -1.241901214 | 1.437898413  | -1.574447840 |
| 6  | -0.818623446 | -0.178242244 | 1.460089990  |
| 1  | -1.251484085 | -1.111078544 | 1.817211607  |
| 1  | 0.262686232  | -0.237185710 | 1.890479372  |
| 6  | -0.818362032 | -1.175421206 | -0.884947876 |
| 1  | -1.245871631 | -1.016616701 | -1.873427693 |
| 1  | -1.247102498 | -2.080528618 | -0.458279140 |
| 1  | 0.263068298  | -1.522931376 | -1.145318958 |
| 1  | -1.247132131 | 2.130625299  | 0.054967758  |
| 1  | -1.242053617 | 0.646528125  | 2.030655779  |
| 20 | 1.343217490  | -0.000488431 | 0.000283110  |

(p)SrC(CH<sub>3</sub>)<sub>3</sub><sup>+</sup>

|    |              |              |              |
|----|--------------|--------------|--------------|
| 6  | 1.068402516  | -0.000163516 | 0.000321211  |
| 6  | 1.551569920  | 0.669614541  | -1.283577098 |
| 1  | 1.223248775  | 1.711668792  | -1.366263160 |
| 1  | 2.649130102  | 0.694693838  | -1.331507327 |
| 6  | 1.556847933  | -1.445084111 | 0.061127910  |
| 1  | 2.654607086  | -1.495443793 | 0.061572419  |
| 1  | 1.231716669  | -1.963017931 | 0.970195156  |
| 6  | 1.556603454  | 0.776851781  | 1.220096466  |
| 1  | 2.654345143  | 0.805083917  | 1.261814683  |
| 1  | 1.231191725  | 0.327929024  | 2.165054629  |
| 1  | 1.228986644  | 1.822338805  | 1.214046382  |
| 1  | 1.223474733  | 0.140947419  | -2.185443300 |
| 1  | 1.229104121  | -2.038597142 | -0.799555073 |
| 38 | -1.308588131 | -0.000339732 | 0.000586328  |

LiCH<sub>3</sub>

|   |              |              |              |
|---|--------------|--------------|--------------|
| 6 | 0.000000000  | 0.384660001  | 0.000000000  |
| 1 | 1.010060195  | 0.806160263  | 0.000000000  |
| 1 | -0.505029833 | 0.806160263  | 0.874740047  |
| 1 | -0.505029833 | 0.806160263  | -0.874740047 |
| 3 | 0.000000000  | -1.575480264 | 0.000000000  |

NaCH<sub>3</sub>

|    |              |              |              |
|----|--------------|--------------|--------------|
| 6  | 0.000000529  | -1.199601431 | 0.000000000  |
| 1  | -1.020149488 | -1.590601504 | 0.000000000  |
| 1  | 0.510070775  | -1.590601504 | 0.883469884  |
| 1  | 0.510070775  | -1.590601504 | -0.883469884 |
| 11 | 0.000000529  | 1.088128656  | 0.000000000  |

KCH<sub>3</sub>

|    |              |              |              |
|----|--------------|--------------|--------------|
| 6  | 0.000000529  | -1.773516912 | 0.000000000  |
| 1  | -1.015289524 | -2.186427040 | 0.000000000  |
| 1  | 0.507640264  | -2.186427040 | 0.879260279  |
| 1  | 0.507640264  | -2.186427040 | -0.879260279 |
| 19 | 0.000000529  | 0.905283099  | 0.000000000  |

BeCH<sub>3</sub><sup>+</sup>

|   |              |              |              |
|---|--------------|--------------|--------------|
| 6 | 0.000000000  | 0.425841633  | 0.000000000  |
| 1 | 1.031780275  | 0.783061676  | 0.000000000  |
| 1 | -0.515890137 | 0.783061676  | 0.893550181  |
| 1 | -0.515890137 | 0.783061676  | -0.893550181 |
| 4 | 0.000000000  | -1.226058706 | 0.000000000  |

MgCH<sub>3</sub><sup>+</sup>

|    |              |              |              |
|----|--------------|--------------|--------------|
| 6  | 0.000000000  | -1.133990331 | 0.000000000  |
| 1  | 1.041000130  | -1.444899957 | 0.000000000  |
| 1  | -0.520499800 | -1.444899957 | 0.901530174  |
| 1  | -0.520499800 | -1.444899957 | -0.901530174 |
| 12 | 0.000000000  | 0.928220287  | 0.000000000  |

CaCH<sub>3</sub><sup>+</sup>

|    |              |              |              |
|----|--------------|--------------|--------------|
| 6  | -0.000000529 | -1.520726824 | 0.000000000  |
| 1  | 1.013849633  | -1.931636662 | 0.000000000  |
| 1  | -0.506920583 | -1.931636662 | 0.878019888  |
| 1  | -0.506920583 | -1.931636662 | -0.878019888 |
| 20 | -0.000000529 | 0.745963705  | 0.000000000  |

SrCH<sub>3</sub><sup>+</sup>

|    |              |              |              |
|----|--------------|--------------|--------------|
| 6  | -1.907349543 | 0.000189445  | 0.000540819  |
| 1  | -2.318188471 | -0.693846625 | -0.740037449 |
| 1  | -2.323940098 | 0.985246015  | -0.233189363 |
| 1  | -2.328600033 | -0.293302840 | 0.967341832  |
| 38 | 0.484600416  | 0.000020109  | 0.000069322  |

LiC(Ph)<sub>3</sub>

|   |              |              |              |
|---|--------------|--------------|--------------|
| 6 | 0.000330736  | -0.000049743 | -0.436760676 |
| 6 | -0.889682425 | -1.145322662 | -0.266570922 |
| 6 | -0.541117075 | -2.270666237 | 0.517039510  |
| 6 | -2.203123641 | -1.143734601 | -0.791810564 |
| 6 | -1.434257144 | -3.315210797 | 0.743319406  |
| 1 | 0.466636965  | -2.365247145 | 0.908759265  |
| 6 | -3.081398592 | -2.180091201 | -0.562540816 |
| 1 | -2.509337877 | -0.304217650 | -1.402510743 |
| 6 | -2.708745623 | -3.282510818 | 0.209879105  |
| 1 | -1.116189338 | -4.161051416 | 1.339509545  |
| 1 | -4.070570573 | -2.141830098 | -1.000880557 |

|   |              |              |              |
|---|--------------|--------------|--------------|
| 1 | -3.400056431 | -4.096071625 | 0.378439522  |
| 6 | -0.546878228 | 1.343151343  | -0.266640774 |
| 6 | -1.696325298 | 1.603072095  | 0.516439423  |
| 6 | 0.111099705  | 2.480373360  | -0.790890854 |
| 6 | -2.155227279 | 2.898473129  | 0.742809279  |
| 1 | -2.281799068 | 0.777031172  | 0.907389225  |
| 6 | -0.348002834 | 3.758824318  | -0.561330588 |
| 1 | 0.991776592  | 2.326400773  | -1.401010525 |
| 6 | -1.489791651 | 3.986419219  | 0.210319381  |
| 1 | -3.047340215 | 3.045249436  | 1.338329480  |
| 1 | 0.179693777  | 4.596762733  | -0.998890851 |
| 1 | -1.849299857 | 4.991656493  | 0.379009446  |
| 6 | 1.437002516  | -0.197918112 | -0.266630720 |
| 6 | 2.237683678  | 0.667974091  | 0.515279467  |
| 6 | 2.092146705  | -1.337328277 | -0.789840966 |
| 6 | 3.588995993  | 0.417147250  | 0.741179414  |
| 1 | 1.816023604  | 1.588766318  | 0.905519642  |
| 6 | 3.428803456  | -1.579413639 | -0.560700867 |
| 1 | 1.517953935  | -2.023343079 | -1.399090670 |
| 6 | 4.197678948  | -0.703908931 | 0.209599171  |
| 1 | 4.162800876  | 1.116731745  | 1.335639672  |
| 1 | 3.889949148  | -2.456052903 | -0.997620825 |
| 1 | 5.248007415  | -0.895445694 | 0.377839435  |
| 3 | 0.002199790  | 0.001661087  | 1.552229274  |

NaC(Ph)<sub>3</sub>

|   |              |              |              |
|---|--------------|--------------|--------------|
| 6 | -0.000061385 | 0.000191033  | -0.479309173 |
| 6 | -0.436637907 | 1.383805915  | -0.343969445 |
| 6 | -1.591811203 | 1.760419246  | 0.385460646  |
| 6 | 0.322151467  | 2.455854461  | -0.871539054 |
| 6 | -1.953375263 | 3.091417505  | 0.565070813  |
| 1 | -2.254815791 | 0.993931931  | 0.773820654  |
| 6 | -0.039684060 | 3.773621701  | -0.686629177 |
| 1 | 1.204383606  | 2.221475508  | -1.452989490 |
| 6 | -1.183472638 | 4.113336561  | 0.037100617  |
| 1 | -2.853944981 | 3.322389615  | 1.120560871  |
| 1 | 0.568709435  | 4.554059187  | -1.126229418 |
| 1 | -1.467272513 | 5.147646833  | 0.170390841  |
| 6 | 1.416433925  | -0.313437506 | -0.344259434 |
| 6 | 2.320383498  | 0.498769666  | 0.384920885  |
| 6 | 1.965456380  | -1.506769774 | -0.871579271 |
| 6 | 3.653869948  | 0.146318039  | 0.564431037  |
| 1 | 1.988333770  | 1.456353470  | 0.773070810  |
| 6 | 3.287577161  | -1.852312992 | -0.686729191 |
| 1 | 1.321345007  | -2.153657210 | -1.452979435 |
| 6 | 4.153865189  | -1.031493461 | 0.036670925  |
| 1 | 4.304226671  | 0.810918096  | 1.119660741  |

|    |              |              |              |
|----|--------------|--------------|--------------|
| 1  | 3.659109861  | -2.769542268 | -1.126209309 |
| 1  | 5.191523035  | -1.302825391 | 0.169800808  |
| 6  | -0.979960064 | -1.069695296 | -0.344468989 |
| 6  | -0.728464872 | -2.258884635 | 0.384271055  |
| 6  | -2.288042301 | -0.948252292 | -0.871429514 |
| 6  | -1.700447059 | -3.237431266 | 0.563920910  |
| 1  | 0.267021252  | -2.450299688 | 0.771951071  |
| 6  | -3.248397936 | -1.920406462 | -0.686449257 |
| 1  | -2.526293245 | -0.066806511 | -1.452499472 |
| 6  | -2.970646027 | -3.081199621 | 0.036670925  |
| 1  | -1.450023980 | -4.133072756 | 1.118920951  |
| 1  | -4.228645342 | -1.783355905 | -1.125569534 |
| 1  | -3.724534690 | -3.844068423 | 0.169960620  |
| 11 | 0.000768365  | -0.002386060 | 1.901401061  |

KC(Ph)<sub>3</sub>

|   |              |              |              |
|---|--------------|--------------|--------------|
| 6 | 0.000049213  | 0.000019050  | -0.557830080 |
| 6 | -0.450023974 | 1.380465748  | -0.459730144 |
| 6 | -1.629240439 | 1.760321348  | 0.228229914  |
| 6 | 0.306521688  | 2.451952308  | -0.991969741 |
| 6 | -2.012861665 | 3.088631916  | 0.368050185  |
| 1 | -2.289238771 | 0.993959977  | 0.620650299  |
| 6 | -0.076603699 | 3.769602071  | -0.846749746 |
| 1 | 1.204799539  | 2.219242380  | -1.548739880 |
| 6 | -1.242150457 | 4.110869537  | -0.161290050 |
| 1 | -2.932102344 | 3.319289166  | 0.892670160  |
| 1 | 0.533079402  | 4.547149191  | -1.289929871 |
| 1 | -1.543205744 | 5.143892320  | -0.059019668 |
| 6 | 1.420499594  | -0.300480601 | -0.459799995 |
| 6 | 2.339272480  | 0.531014023  | 0.227690153  |
| 6 | 1.969989312  | -1.491667055 | -0.991669698 |
| 6 | 3.681481888  | 0.199106644  | 0.367260124  |
| 1 | 2.005755344  | 1.485959349  | 0.619840129  |
| 6 | 3.302734914  | -1.818642502 | -0.846720112 |
| 1 | 1.319197077  | -2.153460356 | -1.548029724 |
| 6 | 4.181278158  | -0.979565297 | -0.161899663 |
| 1 | 4.341028831  | 0.880058278  | 0.891410189  |
| 1 | 3.671171398  | -2.735562738 | -1.289659990 |
| 1 | 5.226466197  | -1.235306078 | -0.059860001 |
| 6 | -0.970477207 | -1.079858674 | -0.459949752 |
| 6 | -0.710054266 | -2.291249116 | 0.227640411  |
| 6 | -2.276732725 | -0.959988385 | -0.992009959 |
| 6 | -1.668811785 | -3.287481909 | 0.367280232  |
| 1 | 0.283671285  | -2.479812961 | 0.619930089  |
| 6 | -3.226552440 | -1.950332494 | -0.846820126 |
| 1 | -2.524118327 | -0.065545482 | -1.548610231 |
| 6 | -2.939479075 | -3.130667640 | -0.161790123 |

|    |              |              |              |
|----|--------------|--------------|--------------|
| 1  | -1.409138688 | -4.199140536 | 0.891570000  |
| 1  | -4.204811728 | -1.810758819 | -1.289770059 |
| 1  | -3.683721366 | -3.907789301 | -0.059629809 |
| 19 | 0.000428104  | -0.000761486 | 2.161560472  |

MgC(Ph)<sub>3</sub><sup>+</sup>

|    |              |              |              |
|----|--------------|--------------|--------------|
| 6  | -0.000310098 | -0.000269880 | 0.327519441  |
| 6  | 0.938330748  | -1.131762495 | 0.049859610  |
| 6  | 2.235600836  | -1.132528215 | 0.583839671  |
| 6  | 0.576463999  | -2.181141089 | -0.797220343 |
| 6  | 3.129881811  | -2.142735521 | 0.296779535  |
| 1  | 2.549653246  | -0.314645088 | 1.229349659  |
| 6  | 1.479456290  | -3.196465539 | -1.092310744 |
| 1  | -0.404861342 | -2.195122481 | -1.249630377 |
| 6  | 2.750543746  | -3.186999616 | -0.545470616 |
| 1  | 4.121285862  | -2.124520711 | 0.727689627  |
| 1  | 1.180288049  | -3.995203562 | -1.756760515 |
| 1  | 3.446754206  | -3.983442068 | -0.767940436 |
| 6  | -1.449529200 | -0.247253836 | 0.049519349  |
| 6  | -2.099441942 | -1.370176955 | 0.583019447  |
| 6  | -2.176613448 | 0.591048124  | -0.797680727 |
| 6  | -3.421483876 | -1.638759809 | 0.296269408  |
| 1  | -1.548458886 | -2.050906863 | 1.228919438  |
| 6  | -3.507514338 | 0.317722254  | -1.092280581 |
| 1  | -1.696964015 | 1.447135202  | -1.250580780 |
| 6  | -4.135602753 | -0.787333195 | -0.545550522 |
| 1  | -3.902300145 | -2.505656920 | 0.727719790  |
| 1  | -4.049690297 | 0.976405051  | -1.756560486 |
| 1  | -5.173686058 | -0.990773272 | -0.767820313 |
| 6  | 0.510149093  | 1.378217803  | 0.049119820  |
| 6  | -0.139319140 | 2.502725278  | 0.579399874  |
| 6  | 1.602230174  | 1.588445107  | -0.794830578 |
| 6  | 0.290092322  | 3.781885862  | 0.293219760  |
| 1  | -1.006784588 | 2.366231415  | 1.222139619  |
| 6  | 2.031768639  | 2.877475905  | -1.089350526 |
| 1  | 2.106086292  | 0.744910113  | -1.244730725 |
| 6  | 1.387039188  | 3.974444996  | -0.545400236 |
| 1  | -0.222205760 | 4.631728120  | 0.722499457  |
| 1  | 2.875542821  | 3.017142186  | -1.750800391 |
| 1  | 1.730851996  | 4.975047735  | -0.766840277 |
| 12 | -0.001330352 | 0.001870112  | 2.550219994  |

CaC(Ph)<sub>3</sub><sup>+</sup>

|   |              |             |              |
|---|--------------|-------------|--------------|
| 6 | 0.000159812  | 0.000079906 | -0.695410344 |
| 6 | -0.404042176 | 1.396851721 | -0.531750109 |
| 6 | -1.501858480 | 1.765271272 | 0.289919810  |
| 6 | 0.377079537  | 2.459044342 | -1.037570003 |

|    |              |              |              |
|----|--------------|--------------|--------------|
| 6  | -1.804123995 | 3.104920520  | 0.558400004  |
| 1  | -2.224019263 | 1.015525537  | 0.607319795  |
| 6  | 0.072068650  | 3.774613909  | -0.766489961 |
| 1  | 1.219935067  | 2.220592311  | -1.673110292 |
| 6  | -1.019724559 | 4.112371871  | 0.039579812  |
| 1  | -2.675779997 | 3.342908463  | 1.153530201  |
| 1  | 0.680186973  | 4.558045480  | -1.198649970 |
| 1  | -1.256699127 | 5.148586122  | 0.232949646  |
| 6  | 1.411770816  | -0.347931395 | -0.532660294 |
| 6  | 2.281095792  | 0.420140806  | 0.286479629  |
| 6  | 1.939986020  | -1.557321547 | -1.035600405 |
| 6  | 3.592502850  | 0.011832932  | 0.554510022  |
| 1  | 1.993823455  | 1.421116615  | 0.602169842  |
| 6  | 3.231846330  | -1.951025716 | -0.764820407 |
| 1  | 1.311126595  | -2.169348903 | -1.668960484 |
| 6  | 4.071693487  | -1.172756269 | 0.038279624  |
| 1  | 4.235357956  | 0.648856505  | 1.147470063  |
| 1  | 3.605047526  | -2.870890295 | -1.194830369 |
| 1  | 5.087542352  | -1.485777312 | 0.231570081  |
| 6  | -1.007608517 | -1.048011199 | -0.532850268 |
| 6  | -0.778076826 | -2.185263379 | 0.285929814  |
| 6  | -2.318915031 | -0.899753197 | -1.035950192 |
| 6  | -1.788178826 | -3.115913649 | 0.554120019  |
| 1  | 0.232235786  | -2.438043414 | 0.601430052  |
| 6  | -3.306604258 | -1.820768207 | -0.765080233 |
| 1  | -2.533901226 | -0.048883807 | -1.669160513 |
| 6  | -3.053558577 | -2.937396233 | 0.038029852  |
| 1  | -1.558628086 | -3.991376023 | 1.147010208  |
| 1  | -4.289663183 | -1.683284783 | -1.195260061 |
| 1  | -3.833222935 | -3.659929028 | 0.231319780  |
| 20 | 0.001679079  | -0.003100450 | 1.648140005  |

SrC(Ph)<sub>3</sub><sup>+</sup>

|   |              |              |              |
|---|--------------|--------------|--------------|
| 6 | 0.000149757  | 0.000040217  | -0.814169890 |
| 6 | -0.043884140 | 1.458698783  | -0.701729779 |
| 6 | -1.040425973 | 2.121430845  | 0.060590266  |
| 6 | 0.984876649  | 2.276514704  | -1.217789782 |
| 6 | -1.014214765 | 3.503022682  | 0.267690132  |
| 1 | -1.926439612 | 1.582305592  | 0.388000167  |
| 6 | 1.003706363  | 3.638837081  | -1.007749807 |
| 1 | 1.759277811  | 1.815511889  | -1.816649620 |
| 6 | 0.007080921  | 4.267568975  | -0.257419860 |
| 1 | -1.817524350 | 3.971577385  | 0.820850223  |
| 1 | 1.796148236  | 4.229867742  | -1.447189707 |
| 1 | 0.024558587  | 5.337874941  | -0.111109759 |
| 6 | 1.285454089  | -0.691130888 | -0.701589547 |
| 6 | 2.357416910  | -0.159610442 | 0.061140610  |

|    |              |              |              |
|----|--------------|--------------|--------------|
| 6  | 1.479590701  | -1.990771690 | -1.218079771 |
| 6  | 3.540917064  | -0.872961482 | 0.268110299  |
| 1  | 2.333212342  | 0.877111290  | 0.388990258  |
| 6  | 2.650097967  | -2.688098185 | -1.008169974 |
| 1  | 0.693356078  | -2.430917513 | -1.817199965 |
| 6  | 3.692713146  | -2.139463618 | -0.257479657 |
| 1  | 4.348191246  | -0.411614702 | 0.821550325  |
| 1  | 2.765976672  | -3.669685998 | -1.447989823 |
| 1  | 4.610979609  | -2.689594169 | -0.111199720 |
| 6  | -1.241090515 | -0.767438247 | -0.701979550 |
| 6  | -1.316931669 | -1.961758489 | 0.060460617  |
| 6  | -2.463647126 | -0.285483717 | -1.218359706 |
| 6  | -2.526621864 | -2.629779148 | 0.267430306  |
| 1  | -0.407033615 | -2.459323218 | 0.388150454  |
| 6  | -3.652933304 | -0.950180614 | -1.008309676 |
| 1  | -2.451483987 | 0.615622586  | -1.817279871 |
| 6  | -3.699282881 | -2.127525379 | -0.257799810 |
| 1  | -2.530907142 | -3.559709207 | 0.820660249  |
| 1  | -4.560942725 | -0.559484818 | -1.447919972 |
| 1  | -4.634985735 | -2.647440968 | -0.111419857 |
| 38 | -0.000531823 | -0.000357195 | 1.652920592  |

(*p*)LiCF<sub>3</sub>

|   |              |              |              |
|---|--------------|--------------|--------------|
| 6 | 0.063823539  | 0.264609262  | 0.000000000  |
| 9 | -1.285521824 | -0.011807532 | 0.000000000  |
| 9 | 0.532702628  | -0.450379582 | 1.079860261  |
| 9 | 0.532702628  | -0.450379582 | -1.079860261 |
| 3 | 0.532702628  | 2.208479973  | 0.000000000  |

(*i*)LiCF<sub>3</sub>

|   |              |              |              |
|---|--------------|--------------|--------------|
| 6 | 0.000000000  | 0.000000000  | 0.745795000  |
| 3 | 0.000000000  | 0.000000000  | -1.400930000 |
| 9 | 0.000000000  | 1.241703000  | -0.010073000 |
| 9 | -1.075346000 | -0.620851000 | -0.010073000 |
| 9 | 1.075346000  | -0.620851000 | -0.010073000 |

(*p*)NaCF<sub>3</sub>

|    |              |              |              |
|----|--------------|--------------|--------------|
| 6  | -0.218520041 | 0.000002117  | 0.000000000  |
| 9  | -0.807659951 | 1.246672276  | 0.000000000  |
| 9  | -0.807659951 | -0.623337990 | 1.079650178  |
| 9  | -0.807659951 | -0.623337990 | -1.079650178 |
| 11 | 2.101630619  | 0.000002117  | 0.000000000  |

(*i*)NaCF<sub>3</sub>

|    |             |             |              |
|----|-------------|-------------|--------------|
| 6  | 0.000000000 | 0.000000000 | -1.076992000 |
| 11 | 0.000000000 | 0.000000000 | 1.451401000  |
| 9  | 0.000000000 | 1.246857000 | -0.351980000 |



|   |              |              |              |
|---|--------------|--------------|--------------|
| 9 | 1.079810000  | -0.623429000 | -0.351980000 |
| 9 | -1.079810000 | -0.623429000 | -0.351980000 |

$(C_{2v})KCF_3$

|    |              |              |              |
|----|--------------|--------------|--------------|
| 6  | 0.759100001  | 0.000000000  | -0.304649988 |
| 9  | 1.603080033  | 1.068860254  | -0.255990023 |
| 9  | 1.603140359  | -1.068809982 | -0.256069929 |
| 9  | 0.244659809  | -0.000059797 | 1.092749961  |
| 19 | -1.874339995 | 0.000000000  | -0.178850268 |

$(i)KCF_3$

|    |              |              |              |
|----|--------------|--------------|--------------|
| 6  | -0.493248000 | 0.003258000  | 0.000000000  |
| 19 | -3.405309000 | -0.001167000 | 0.000000000  |
| 9  | -1.206620000 | -0.622018000 | 1.083893000  |
| 9  | -1.206620000 | -0.622018000 | -1.083893000 |
| 9  | -1.205357000 | 1.254805000  | 0.000000000  |

$(p)BeCF_3^+$

|   |              |              |              |
|---|--------------|--------------|--------------|
| 6 | -0.000080964 | 0.000077789  | 0.121429774  |
| 9 | 1.243219395  | -0.091616457 | -0.314030184 |
| 9 | -0.543215792 | 1.122649534  | -0.311120238 |
| 9 | -0.701792222 | -1.031273323 | -0.310430191 |
| 4 | 0.004146104  | 0.000424400  | 1.922910000  |

$(p)MgCF_3^+$

|    |              |              |              |
|----|--------------|--------------|--------------|
| 6  | 0.309342732  | 0.000000000  | 0.000000000  |
| 9  | 0.756762625  | 1.246180142  | 0.000000000  |
| 9  | 0.756762625  | -0.623089806 | 1.079219957  |
| 9  | 0.756762625  | -0.623089806 | -1.079219957 |
| 12 | -1.857387273 | 0.000000000  | 0.000000000  |

$(i)MgCF_3^+$

|    |              |              |              |
|----|--------------|--------------|--------------|
| 6  | 0.000000000  | 0.000000000  | -1.102112000 |
| 12 | 0.000000000  | 0.000000000  | 1.193217000  |
| 9  | 0.000000000  | 1.242710000  | -0.285405000 |
| 9  | 1.076219000  | -0.621355000 | -0.285405000 |
| 9  | -1.076219000 | -0.621355000 | -0.285405000 |

$(p)CaCF_3^+$

|    |              |              |              |
|----|--------------|--------------|--------------|
| 6  | 0.617267269  | 0.001474817  | 0.000000000  |
| 9  | 1.137446388  | 1.251841809  | 0.000000000  |
| 9  | 1.137446388  | -0.624103181 | 1.083039558  |
| 9  | 1.137446388  | -0.624103181 | -1.083039558 |
| 20 | -1.720733069 | -0.002078608 | 0.000000000  |

$(i)CaCF_3^+$

|   |             |             |              |
|---|-------------|-------------|--------------|
| 6 | 0.000000000 | 0.000000000 | -1.383799000 |
|---|-------------|-------------|--------------|

|    |              |              |              |
|----|--------------|--------------|--------------|
| 20 | 0.000000000  | 0.000000000  | 1.220483000  |
| 9  | 0.000000000  | 1.254201000  | -0.596550000 |
| 9  | 1.086170000  | -0.627100000 | -0.596550000 |
| 9  | -1.086170000 | -0.627100000 | -0.596550000 |

$(C_{2v})SrCF_3^+$

|    |              |              |              |
|----|--------------|--------------|--------------|
| 6  | 0.365070388  | 1.173208186  | 0.000000000  |
| 9  | 0.964263608  | 2.310159265  | 0.000000000  |
| 9  | 0.964263608  | 0.401136463  | 1.093861762  |
| 9  | 0.964263608  | 0.401136463  | -1.093861762 |
| 38 | -0.742777000 | -0.922398279 | 0.000000000  |

$MgC(CN)_3^+$

|    |              |              |              |
|----|--------------|--------------|--------------|
| 6  | -0.000012171 | -0.000889547 | -1.315542049 |
| 6  | 0.013371780  | 1.280802092  | -0.682811692 |
| 6  | 1.103050925  | -0.652500419 | -0.681861819 |
| 6  | -1.116433289 | -0.629341506 | -0.681861819 |
| 7  | 0.020913614  | 2.002731096  | 0.228478098  |
| 7  | 1.724398680  | -1.019293279 | 0.229638055  |
| 7  | -1.745298535 | -0.983086972 | 0.229638055  |
| 12 | 0.000003704  | 0.000760428  | 1.279848515  |

$CaC(CN)_3^+$

|    |              |              |              |
|----|--------------|--------------|--------------|
| 6  | 0.000327032  | 0.002630011  | -1.335998454 |
| 6  | -0.679470467 | -1.151220872 | -0.863518314 |
| 6  | -0.658461601 | 1.166979770  | -0.859378561 |
| 6  | 1.338666037  | -0.010459188 | -0.860908412 |
| 7  | -1.128496413 | -1.913732479 | -0.114298052 |
| 7  | -1.093563835 | 1.934725469  | -0.107308150 |
| 7  | 2.222174022  | -0.019680631 | -0.110138190 |
| 20 | -0.000358253 | -0.002838507 | 1.292051871  |

$SrC(CN)_3^+$

|    |              |              |              |
|----|--------------|--------------|--------------|
| 6  | -1.643730371 | 0.001134556  | 0.003199935  |
| 6  | -1.211688898 | -1.053660696 | -0.840405969 |
| 6  | -1.205970079 | -0.202068978 | 1.336565203  |
| 6  | -1.209152022 | 1.257881838  | -0.489359307 |
| 7  | -0.522294770 | -1.781340798 | -1.421738398 |
| 7  | -0.511849340 | -0.342234273 | 2.253742620  |
| 7  | -0.518096277 | 2.123638043  | -0.829326055 |
| 38 | 1.118129831  | -0.000530236 | -0.002072258 |
